# Supplementary material for: Metabolomic analyses uncover an inhibitory effect of niclosamide on mitochondrial membrane potential in cholangiocarcinoma cells
Source: PeerJ. 2023 Nov 22;11:e16512. doi: 10.7717/peerj.16512 (PMC10676079; doi:10.7717/peerj.16512)
Supplement: Supplemental Information 3 [file peerj-11-16512-s003.xlsx]

## Sheet: Figure 1, Teble 1
	Raw data of percent of cell viability, related to figure 1
		KKU-055			KKU-100			KKU-213A			KKU-213C			KKU-452			MMNK1			NF
	Niclosamide (uM)	1	2	3	1	2	3	1	2	3	1	2	3	1	2	3	1	2	3	1	2	3
	0	100	100	100	100	100	100	100	100	100	100	100	100	100	100	100	100	100	100	100	100	100
	0.1	96.36	97.51	93.16	96.4076	90.9857	103.594	95.5084	101.902	93.193	93.52	96.68	95.04	81.65	76.28	82.5	89.39	93.3	94.37	100	109.281	132.015
	0.2	83.24	81.07	81.39	87.2632	94.132	80.7719	80.8505	92.7711	86.7523	85.69	86.81	84.78	74.46	78.83	82.08	94.45	95.31	88.64	89.41	88.399	116.949
	0.4	65.96	61.34	60.27	64.3799	77.939	65.7222	48.8987	58.1294	51.1997	72.11	73.08	68.18	53.6	52.92	58.33	80.6	83.13	83.76	84.127	101.513	81.037
	0.6	48.25	39.7	42.97	49.2084	42.1343	36.9731	38.1443	36.5885	30.7874	49.86	50.38	39.59	41.73	44.89	50	78.07	80.56	79.88	84.127	95.36	95.461
	0.8	14.21	15.93	12.64	11.6095	7.53126	5.45957	23.7469	11.7311	16.999	26.42	25.19	22.28	36.33	37.23	41.67	65.14	70.4	66.72	95.461	104.64	105.65
	1	1.14	0.02	-0.38	0	0	0	10.7714	0.475436	4.42717	0.39	0	0	34.53	32.85	40	56.58	58.32	59.89	93.197	72.769	90.584
		Two-way ANOVA
	KKU-055	Significant?	Summary	Individual P Value
	0 vs 0.1	No	ns	0.3237
	0 vs 0.2	Yes	****	<0.0001
	0 vs 0.4	Yes	****	<0.0001
	0 vs 0.6	Yes	****	<0.0001
	0 vs 0.8	Yes	****	<0.0001
	0 vs 1	Yes	****	<0.0001
	KKU-100
	0 vs 0.1	No	ns	0.4923
	0 vs 0.2	Yes	**	0.0047
	0 vs 0.4	Yes	****	<0.0001
	0 vs 0.6	Yes	****	<0.0001
	0 vs 0.8	Yes	****	<0.0001
	0 vs 1	Yes	****	<0.0001
	KKU-213A
	0 vs 0.1	No	ns	0.4741
	0 vs 0.2	Yes	**	0.0031
	0 vs 0.4	Yes	****	<0.0001
	0 vs 0.6	Yes	****	<0.0001
	0 vs 0.8	Yes	****	<0.0001
	0 vs 1	Yes	****	<0.0001
	KKU-213C
	0 vs 0.1	No	ns	0.2618
	0 vs 0.2	Yes	**	0.0015
	0 vs 0.4	Yes	****	<0.0001
	0 vs 0.6	Yes	****	<0.0001
	0 vs 0.8	Yes	****	<0.0001
	0 vs 1	Yes	****	<0.0001
	KKU-452
	0 vs 0.1	Yes	****	<0.0001
	0 vs 0.2	Yes	****	<0.0001
	0 vs 0.4	Yes	****	<0.0001
	0 vs 0.6	Yes	****	<0.0001
	0 vs 0.8	Yes	****	<0.0001
	0 vs 1	Yes	****	<0.0001
	MMNK1
	0 vs 0.1	No	ns	0.0825
	0 vs 0.2	No	ns	0.1018
	0 vs 0.4	Yes	***	0.0001
	0 vs 0.6	Yes	****	<0.0001
	0 vs 0.8	Yes	****	<0.0001
	0 vs 1	Yes	****	<0.0001
	NF
	0 vs 0.1	Yes	**	0.0021
	0 vs 0.2	No	ns	0.6894
	0 vs 0.4	Yes	*	0.0124
	0 vs 0.6	No	ns	0.0583
	0 vs 0.8	No	ns	0.6611
	0 vs 1	Yes	**	0.0013

## Sheet: Figure 2, S1, S2
Raw data of LC-MS positive mode, related to figure 2, S1 and S2
Bucket label	RT	m/z	Name	Formula	K100_CT1_25_01_1482	K100_CT2_26_01_1483	K100_CT3_27_01_1484	K100_CT4_28_01_1485	K100_CT5_29_01_1486	K100_IC25-1_30_01_1488	K100_IC25-2_31_01_1489	K100_IC25-3_32_01_1490	K100_IC25-4_33_01_1491	K100_IC25-5_34_01_1492	K100_IC50-1_35_01_1494	K100_IC50-2_36_01_1495	K100_IC50-3_37_01_1496	K100_IC50-4_38_01_1497	K100_IC50-5_39_01_1498	K100_IC75-1_40_01_1500	K100_IC75-2_41_01_1501	K100_IC75-3_42_01_1502	K100_IC75-4_43_01_1503	K100_IC75-5_44_01_1504	K213_CT1_25_01_1791	K213_CT2_26_01_1792	K213_CT3_27_01_1793	K213_CT4_28_01_1794	K213_CT5_29_01_1795	K213_IC25-1_30_01_1797	K213_IC25-2_31_01_1798	K213_IC25-3_32_01_1799	K213_IC25-4_33_01_1800	K213_IC25-5_34_01_1801	K213_IC50-1_35_01_1803	K213_IC50-2_36_01_1804	K213_IC50-3_37_01_1805	K213_IC50-4_38_01_1806	K213_IC50-5_39_01_1807	K213_IC75-1_40_01_1809	K213_IC75-2_41_01_1810	K213_IC75-3_42_01_1811	K213_IC75-4_43_01_1812	K213_IC75-5_44_01_1813
group					KKU100-CT	KKU100-CT	KKU100-CT	KKU100-CT	KKU100-CT	KKU100-IC25	KKU100-IC25	KKU100-IC25	KKU100-IC25	KKU100-IC25	KKU100-IC50	KKU100-IC50	KKU100-IC50	KKU100-IC50	KKU100-IC50	KKU100-IC75	KKU100-IC75	KKU100-IC75	KKU100-IC75	KKU100-IC75	KKU213-CT	KKU213-CT	KKU213-CT	KKU213-CT	KKU213-CT	KKU213-IC25	KKU213-IC25	KKU213-IC25	KKU213-IC25	KKU213-IC25	KKU213-IC50	KKU213-IC50	KKU213-IC50	KKU213-IC50	KKU213-IC50	KKU213-IC75	KKU213-IC75	KKU213-IC75	KKU213-IC75	KKU213-IC75
187.16823 Da 60.22 s	1	188.175		C9H21N3O	13954	8665	0	10237	13795	17051	13761	11695	0	5952	0	29764	32909	0	6623	29194	34834	34552	33294	8125	589	947	0	720	910	1192	20630	25116	4509	6197	20011	17293	14451	7649	10464	11477	18228	10831	8799	9933
214.09674 Da 60.74 s	1.01	108.056			6082	3623	476	3849	4154	3252	3497	4269	0	4018	0	3111	3393	0	3930	3462	1960	2742	0	0	3402	2835	2818	4044	1970	2254	5140	3541	1721	4291	2857	3217	5368	555	2748	2642	3281	470	1228	2490
221.88184 Da 61.53 s	1.03	222.889			1581	966	0	1702	1235	1673	837	2370	0	1510	0	4154	0	0	2109	2653	3137	2939	2647	2454	3052	3100	6042	3500	3353	976	3823	3430	2638	2633	3959	1951	4590	2405	3124	3200	3955	3642	4295	2889
157.95191 Da 61.71 s	1.03	158.959			6681	19736	2837	6979	6189	7440	21073	6823	2936	7123	3043	6905	8272	2905	6194	4511	8367	8514	19115	1621	16859	18809	33672	18106	25722	8549	17057	10918	19490	20559	26328	15817	28922	21155	148	23848	23799	26388	27766	23180
103.09845 Da 62.02 s	1.03	104.106	Choline	C5H13NO	34788	27487	0	31709	19394	55060	0	37202	1069	23425	0	39207	41973	0	36865	80256	50482	54884	52926	59645	68471	99315	106285	96585	90016	28962	56982	90724	102117	104697	78322	114713	106027	93756	68333	62140	84278	94844	88542	84354
155.06446 Da 62.07 s	1.03	156.072		C6H9N3O2	1474	1047	1896	1189	1314	1083	1374	1381	3087	896	766	1218	1304	0	1224	1635	1570	1405	1989	1309	2117	2406	1518	2078	1955	644	2006	2469	2214	2756	2865	3393	2519	2047	2196	2318	2849	1881	1913	2611
87.03363 Da 62.74 s	1.05	88.0409		C3H5NO2	2424	2491	491	2032	2372	2699	2300	2164	0	2070	0	2114	2063	0	2312	2403	2659	1748	2651	2761	1501	1870	1380	1759	1645	616	1267	1183	1788	1352	1351	1899	1032	1636	1330	1149	1196	747	1145	1052
137.89314 Da 62.87 s	1.05	138.9			1033	1371	0	1554	1174	1338	1739	968	0	1518	0	1577	1264	0	1144	1362	0	1491	1020	939	1188	1118	2383	1327	1276	0	1885	0	855	1028	0	761	1730	1018	972	0	1259	1242	1279	1122
101.04611 Da 63.00 s	1.05	102.053		C4H7NO2	5740	4258	0	5140	5362	5702	5429	7603	0	5439	0	5895	9193	0	9112	7936	7451	9047	10407	11387	4580	5740	3268	4239	4642	2593	3896	4356	6044	6497	4796	5993	3065	4746	4986	2750	2897	1726	2233	3229
161.10223 Da 63.81 s	1.06	162.11	L-Carnitine	C7H15NO3	83771	70253	437	83747	73688	54361	53096	45689	397	46261	407	39825	46115	412	38879	32554	32117	34330	54438	60020	16960	16499	18669	12825	16540	15140	12223	12582	9326	11192	9693	10424	9924	10026	9997	7347	9339	10102	8774	8813
288.99184 Da 64.28 s	1.07	289.999		C8H8N3O5PS	1324	1336	1703	1699	1310	893	1102	0	1205	593	1068	0	0	762	0	0	0	0	0	0	0	1781	1549	1690	1846	0	1472	1673	1837	1741	1822	1925	0	1618	1681	851	1109	466	892	1025
257.10356 Da 65.65 s	1.09	258.111	Glycerophosphocholine	C8H20NO6P	0	0	0	0	0	0	0	0	0	0	0	0	0	0	0	0	17034	0	0	0	42914	46489	45928	36440	46795	0	75478	100910	80908	98493	102043	137185	0	100161	107040	95291	106960	136701	104626	134730
89.04822 Da 66.08 s	1.1	90.0555		C3H7NO2	3419	0	0	2684	2663	2520	1901	2746	0	1684	0	1490	3249	0	2723	2687	2796	2908	3123	3559	10657	14139	11838	8369	11043	7939	7887	11648	9024	11056	9381	13787	9131	8368	8430	5828	7453	5832	5436	7183
133.02556 Da 66.64 s	1.11	134.033			5994	5424	891	4909	5742	6086	5578	4858	681	4827	682	5265	4098	559	4854	5449	0	3980	6669	6698	4411	2253	3134	1727	2438	1147	1685	2579	2439	3160	2337	3896	2074	3852	2563	2097	2165	2849	2257	3894
145.10333 Da 67.64 s	1.13	146.111			11466	8305	0	11742	8398	8157	8493	6892	0	6926	0	7376	7750	189	7870	6027	0	5780	7450	11055	5764	0	8083	5777	0	4254	0	0	0	0	0	0	3915	3857	0	0	2719	0	2541	3293
115.06109 Da 68.44 s	1.14	116.068		C5H9NO2	122059	76908	0	77924	99902	79786	0	75423	0	0	0	51935	60710	2344	61529	58026	55706	56930	93506	87220	73654	81834	60837	56099	61424	2692	60106	88812	84587	88428	90615	0	51889	59169	55438	61382	57092	39810	46464	56168
69.05825 Da 68.57 s	1.14	70.0655		C4H7N	0	0	0	0	0	0	0	0	0	0	0	0	0	0	5080	5020	0	5666	0	0	0	8036	6175	5784	6188	213	5656	8544	8627	8656	9499	9431	0	5897	4954	6148	5653	3898	0	5543
133.10800 Da 71.62 s	1.19	134.115		C6H15NO2	0	0	0	2607	1523	2088	0	2269	0	3594	0	2691	2385	533	2429	3986	2316	2691	3068	3896	0	2623	5031	3361	2807	1303	3317	3452	3158	4039	5476	4227	3026	3351	2961	4377	3420	3712	3242	2418
203.08367 Da 74.03 s	1.23	204.091		C6H13N5OS	4372	3390	0	3234	3875	3768	2917	3118	0	3991	0	2516	2924	0	3914	4812	2726	2842	2979	5220	959	975	553	688	755	1746	812	1031	754	858	1127	1676	1105	811	982	763	778	762	485	1116
159.12230 Da 78.12 s	1.3	160.13		C8H17NO2	8007	7221	0	7751	6625	5111	5263	4851	0	4134	0	4761	5161	0	4114	4327	3764	4125	4299	4461	5168	8465	7138	6359	6364	5194	5438	6659	7067	6625	4035	5228	4091	3717	3875	1892	2714	2729	2738	3165
78.02406 Da 78.23 s	1.3	79.0313		C4H2N2	1430	1583	2648	3734	1057	1452	1970	2851	3487	1338	1672	2132	1617	2499	2174	0	0	0	2206	2738	728	0	252	1332	331	7776	0	0	938	0	663	0	1778	477	170	271	1838	161	2058	267
177.11316 Da 78.42 s	1.31	178.12	N-Isopropyl-p-toluamide	C11H15NO	9701	12696	556	10106	10501	11950	11045	10824	546	11523	500	10729	10305	517	10528	9159	11138	9771	10754	9451	0	0	388	648	442	287	580	0	479	479	769	0	0	0	485	178	388	0	694	414
132.01735 Da 79.14 s	1.32	133.025		C8H4O2	1808	1418	0	1097	1656	1082	1528	1700	0	1193	0	1156	1825	0	1462	2057	0	1703	1682	2054	6380	0	5046	5641	259	1234	0	0	0	0	378	348	6364	6845	306	256	7036	264	6114	7580
145.08233 Da 79.21 s	1.32	146.09		C5H11N3O2	734	910	0	685	759	909	419	648	0	0	0	924	843	0	718	1193	995	0	1109	616	5712	9239	8078	5881	7654	3079	4491	5727	5115	4795	4086	4452	6145	5360	4407	2500	3325	2974	2511	3703
228.14867 Da 79.47 s	1.32	229.156		C11H20N2O3	0	0	0	0	672	789	0	914	1054	651	2545	829	968	1099	787	1161	972	1183	1026	842	2129	1889	2841	3172	2996	0	2249	2284	2640	2917	3183	790	663	511	2260	496	3820	8639	3404	2502
129.07438 Da 79.49 s	1.32	130.082		C6H11NO2	0	1205	11879	1022	1049	0	0	1053	13718	0	13977	0	1385	14581	1076	1496	1324	0	1246	1203	1015	1435	1222	1065	876	5623	1002	1028	1027	1084	1235	1634	1164	1041	1072	922	1061	965	825	1141
71.07480 Da 79.59 s	1.33	72.0821		C4H9N	0	0	0	0	12322	0	0	0	1049	0	0	0	906	1172	14366	23674	19341	21217	0	17811	0	49177	31515	39194	36249	12249	31533	42792	41513	45485	51396	66371	44423	38573	38331	46983	47113	37680	38957	48295
190.05105 Da 79.68 s	1.33	96.0328		C6H11N2O3P	1584	1155	0	1868	1612	1387	1289	1587	0	0	0	1409	1306	0	1369	1504	1629	1356	1571	1616	8491	5413	9283	6478	9046	4231	6391	6914	8051	7453	7532	7419	9154	8374	8911	8991	8385	9595	9362	9342
203.11757 Da 79.76 s	1.33	204.125	L-Acetylcarnitine	C9H17NO4	81937	64700	2139	63602	57818	55455	66524	49051	2342	46451	4653	70109	55563	2212	58504	54921	50749	39803	45895	65698	77626	127791	87736	92520	86936	42224	76477	139767	116377	138402	79149	106755	108901	85670	85808	33276	47449	22918	36007	58886
191.15223 Da 79.77 s	1.33	192.16		C9H21NO3	50669	33944	0	32456	18331	21882	49072	31529	0	46334	0	31970	27318	0	26559	15432	34181	38902	26881	33962	55569	55683	60957	50511	30964	27552	53901	39323	43036	38262	66822	45403	51809	36659	33472	49137	45396	43434	41967	32371
103.04330 Da 79.89 s	1.33	104.051			1630	824	0	1212	1210	824	1565	1594	0	1012	0	1224	1983	0	1585	1432	1306	1600	1794	1545	5576	4968	4984	4555	4888	0	3527	5630	6188	6425	7410	8975	5569	5977	4882	6359	6112	4040	5500	5730
157.14328 Da 80.07 s	1.33	158.151		C9H19NO	0	1576	522	1652	1224	1504	1556	1332	713	1807	681	1754	1905	648	1686	1786	1681	1410	1715	1444	6978	9466	12332	15034	13542	9544	10941	10768	13183	10730	15854	5345	7229	6828	11289	8209	11119	54830	14742	11520
149.04823 Da 80.34 s	1.34	150.056	L-Methionine	C5H11NO2S	5460	3967	0	3943	4064	3170	5201	5629	0	3422	0	4127	870	0	678	6586	4722	961	875	768	19751	17955	16325	14304	18019	3615	14332	18598	20888	22343	27056	31895	18343	20123	16217	22788	21388	15061	17812	21627
184.15658 Da 80.35 s	1.34	185.164		C10H20N2O	6347	7420	0	7442	7329	9073	10557	9464	0	10624	552	4727	4361	0	4554	4064	4822	4329	4358	3986	72890	50321	88347	59320	77761	32405	45328	54751	72686	79057	101333	633	780	652	91092	721	58394	228444	85550	94799
178.03937 Da 80.54 s	1.34	179.047		C5H10N2O3S	9707	4160	325	2798	2396	594	956	958	560	1849	0	608	645	0	775	453	542	441	477	615	8602	12843	14286	11397	14929	327	12369	15931	15749	19992	13378	20873	12229	12737	14578	7616	11255	3820	8511	11516
209.05622 Da 80.75 s	1.35	210.064		C12H7N3O	470	248	0	1137	605	1735	1434	1687	0	986	0	2390	2620	0	2086	2556	2165	2541	4854	2103	1594	1418	1586	1234	1782	776	1001	1042	1125	1447	1383	1241	1077	997	1205	866	726	506	523	830
170.13922 Da 80.95 s	1.35	171.146		C9H18N2O	6449	7986	0	8811	7696	13393	9793	8515	0	10737	0	13775	11990	0	12887	11551	14702	11396	12882	11744	230852	92131	241464	223908	375233	65804	163630	223048	197977	127103	197331	934	1897	677	168039	943	356372	392863	235911	135918
112.01430 Da 81.24 s	1.35	113.022		C5H4O3	896	907	0	1302	1240	1068	525	1597	0	1237	0	1197	1921	0	1346	1197	1145	1584	1374	1443	4828	3363	3004	1181	2073	0	2410	2897	1674	3357	1872	3257	3121	1303	2502	1628	2841	2074	5025	2297
201.17253 Da 81.32 s	1.36	202.18		C11H23NO2	514	552	0	590	681	372	529	593	0	2091	0	517	587	0	906	959	614	732	523	368	24914	18414	22027	22571	23199	19445	16142	17373	20946	22385	28687	45234	64031	73499	22040	84084	20713	19668	25962	26747
181.07231 Da 81.61 s	1.36	182.08		C9H11NO3	9573	7366	192	636	8678	9723	10242	11585	400	8040	239	11096	12970	210	10244	15433	13166	12916	822	11708	1103	1382	10176	0	0	552	0	0	0	14790	17778	24807	0	12944	12009	0	15130	12363	0	0
106.06004 Da 81.63 s	1.36	107.067		C4H10O3	5624	4691	755	895	5251	5604	5059	963	488	5550	698	6597	5057	646	939	1087	6295	934	5635	5293	1819	1800	1930	1235	1757	946	1332	1560	1280	1708	1486	1451	2800	2149	1501	2927	1354	997	1250	1575
193.10998 Da 82.32 s	1.37	194.117			5838	0	0	6918	7618	0	6886	7253	0	7167	0	691	6628	0	6307	5867	7941	6457	6637	5332	1144	561	1178	1060	1121	7657	937	933	912	1119	1177	1129	1501	1093	1065	1087	1053	1029	1233	1199
214.00886 Da 83.20 s	1.39	215.016		C8H6O7	1142	783	0	1182	727	1583	1198	1549	0	906	0	1860	2026	0	1809	7645	6025	7082	2721	1871	8838	12471	7918	7853	9027	4922	5772	5245	6716	7304	7187	5983	6790	4835	6003	4256	3823	1834	2561	4269
131.09318 Da 119.74 s	2	132.1	L-Alloisoleucine	C6H13NO2	1458	891	0	1028	833	939	925	1137	471	893	0	1018	1266	590	1116	1731	1162	1537	1409	1564	32674	39141	17665	26477	21100	9809	21541	30163	26147	25601	29906	39241	32916	23405	21127	25701	29694	22609	21825	27028
223.12094 Da 255.79 s	4.26	224.128		C8H13N7O	1283	0	0	1364	1188	1267	0	1340	0	1201	0	1390	1348	0	1183	1418	1272	1431	1229	1311	1339	1316	1197	1333	1304	1164	1350	1229	1269	1157	1256	1194	1252	1196	1248	1183	1235	1179	1104	1224
165.07629 Da 276.13 s	4.6	166.084	L-Phenylalanine	C9H11NO2	4479	2468	0	2460	2832	2765	3497	4052	0	2991	0	3869	5952	0	3921	5228	4205	4853	4115	4530	41619	54344	25002	39282	31891	7860	31745	41154	42582	37927	46411	65053	45140	34115	30927	40520	43259	29994	34074	41781
231.14681 Da 314.69 s	5.24	232.154	Butyryl-L-carnitine	C11H21NO4	0	0	0	0	0	0	0	0	0	0	0	0	0	0	0	0	0	0	0	0	6097	14589	11958	10364	10169	5990	7182	7079	6488	7567	4772	7306	0	3504	4147	1402	2519	1700	1441	2465
301.19119 Da 318.76 s	5.31	302.198		C15H27NO5	0	0	0	0	0	0	0	0	0	0	0	0	0	0	0	0	0	0	0	0	0	39106	38236	38207	35992	0	34623	32478	35307	36400	45234	145173	0	161920	32612	167436	36555	33309	36345	39298
99.06509 Da 320.27 s	5.34	100.072		C5H9NO	2080	2264	0	2008	2126	2240	2362	2298	0	2272	0	2252	2186	0	2291	2269	2262	2179	2325	2078	331	1071	0	1066	838	0	942	964	238	246	247	0	0	0	1066	907	0	754	0	0
257.16328 Da 326.57 s	5.44	258.171		C13H23NO4	0	0	0	0	0	0	0	0	0	0	0	0	0	0	0	0	0	0	0	0	8147	8212	7486	8277	7380	0	7023	6948	7674	7648	9622	21089	0	18394	6493	19524	7852	7341	7641	8687
204.08836 Da 338.46 s	5.64	205.096	D-Tryptophan	C11H12N2O2	0	0	0	0	0	0	0	0	0	0	0	0	0	0	0	4669	3720	3753	0	2910	22841	34342	16233	24548	20055	6086	19003	25544	27076	27419	29565	43130	0	25526	0	26781	27840	21515	22431	28578
187.06291 Da 338.69 s	5.64	188.07		C11H9NO2	2782	2685	0	2580	2815	2130	3101	3136	0	3066	0	3722	4287	0	3940	5915	0	4596	4471	4334	0	39149	19211	28838	23709	0	23502	33649	33169	33474	37550	51441	29047	28697	25680	32345	33615	26914	26543	35320
112.04776 Da 343.40 s	5.72	113.055		C6H8O2	1816	1641	0	1727	1620	1788	1754	1563	0	1646	0	1842	1950	0	1676	1692	0	2041	1680	1779	1050	1158	1400	835	965	1264	1547	960	880	856	1001	2139	2891	3341	899	3602	754	712	632	765
299.19633 Da 360.27 s	6	300.204		C12H29NO7	0	0	0	0	0	0	0	0	0	0	0	0	0	0	0	0	1942	0	0	0	0	4688	5634	4661	4072	0	3704	4029	3864	3986	5035	2501	0	2648	3901	2989	3919	4945	3970	3912
129.14959 Da 366.51 s	6.11	130.157		C8H19N	0	0	0	3741	2184	4836	0	3567	0	2628	0	4918	5922	0	3940	4680	5796	5229	5021	3340	12508	9284	14739	12701	12191	12105	34154	10399	11425	10501	11084	13038	9902	10134	10468	26770	10281	10719	21211	10676
179.09050 Da 378.58 s	6.31	180.098			0	0	0	0	0	0	0	0	0	0	0	0	0	270	0	0	0	0	0	0	1564	1553	1653	1818	1787	1523	1443	1561	1695	1784	1758	1612	1639	1689	1808	2003	1792	1815	1867	1855
176.08144 Da 388.50 s	6.48	177.089	5,6,7,8-tetrahydro-2-Naphthoic Acid	C11H12O2	5269	5197	258	5148	4749	4460	4447	4823	196	4772	218	4537	4464	0	4421	4064	4091	4286	4118	4082	0	0	0	0	0	0	0	0	0	0	0	0	0	0	0	0	0	0	0	0
170.09037 Da 392.98 s	6.55	171.098		C5H10N6O	468	492	0	0	390	390	329	0	677	388	0	407	453	760	379	434	380	465	378	414	2096	1875	1991	1406	1934	1736	6166	1381	1421	1506	2311	1668	1457	1487	2023	3183	1833	1477	2482	1752
387.24743 Da 394.52 s	6.58	388.255		C16H37NO9	0	0	0	0	0	0	0	0	0	0	0	0	0	0	0	0	0	0	0	0	0	9065	0	0	8515	0	7040	6945	7309	7180	9081	3501	0	0	7067	3393	0	9286	7051	0
192.07999 Da 405.41 s	6.76	193.087		C11H12O3	2276	2056	0	2363	2249	2494	2329	2290	0	2493	0	2355	2790	0	2830	2885	3075	3011	2888	3038	0	0	0	0	0	0	0	0	0	0	0	0	0	0	0	0	0	0	0	0
244.12983 Da 418.58 s	6.98	245.137		C8H16N6O3	0	0	0	0	0	0	0	979	0	0	0	0	0	0	0	0	1083	0	0	0	1654	1732	1557	1617	1687	1377	1579	1564	1538	1396	1483	1444	1509	1585	1512	1656	1497	1437	1475	1543
239.17391 Da 418.76 s	6.98	240.181		C10H25NO5	0	0	0	0	0	0	0	516	0	0	154	526	467	0	451	534	483	419	466	653	1554	1787	1509	1586	1734	1502	1677	1343	1620	1677	1555	1485	1396	1490	1591	1515	1474	1437	1666	1401
222.14210 Da 418.82 s	6.98	223.149		C17H18	475	484	0	469	406	452	490	463	0	494	0	552	634	0	589	570	476	567	558	512	1088	1021	1058	1254	1056	1092	1076	1161	1030	1234	1313	1022	1068	984	1140	1003	1067	1124	1128	946
475.37768 Da 419.85 s	7	476.385		C17H49N9O6	18923	17740	0	18721	16747	15224	19554	15856	16506	14136	14339	16194	15584	15633	15677	14863	16947	15464	15613	14074	12266	0	0	0	0	0	0	0	0	0	0	0	0	2543	0	0	0	0	0	0
193.07395 Da 420.17 s	7	194.081		C10H11NO3	902	594	0	821	537	1031	919	1296	0	675	0	1214	1779	0	1097	2534	1631	1785	1701	1574	1895	2593	0	1383	1565	1379	1520	1893	1539	1769	1441	1624	1347	819	1140	929	1131	864	571	740
166.09567 Da 425.01 s	7.08	167.103		C6H10N6	307	349	323	386	347	357	372	367	370	320	318	431	378	377	389	438	417	391	294	432	1211	1255	1305	1142	1156	1084	1198	1127	1208	1386	1205	1083	1213	1221	1265	1195	1284	1474	1267	1311
289.18997 Da 444.62 s	7.41	290.197		C14H27NO5	348	297	0	302	395	242	332	308	271	501	229	1754	1384	317	1388	299	0	0	341	258	0	4272	4078	3984	4661	0	4160	4133	3933	4234	4236	3791	0	3699	4095	4082	3795	3539	3552	4255
108.09342 Da 446.35 s	7.44	109.101		C8H12	446	365	428	372	352	354	412	328	512	473	419	343	388	484	332	358	418	0	366	0	3998	4298	3806	4081	3787	3531	3699	3778	3373	3654	3723	3541	3630	3225	3566	3343	3236	3332	3384	3451
151.56632 Da 446.84 s	7.45	152.574			0	0	0	0	0	0	0	0	0	0	0	0	0	0	0	0	0	0	0	0	1131	1191	1026	1128	932	1058	1058	1267	1460	1287	1424	1210	1290	1049	1180	0	1219	1154	1048	1211
140.08036 Da 464.92 s	7.75	141.088		C8H12O2	717	625	0	563	600	585	514	441	134	618	0	510	619	0	517	454	609	685	468	590	1585	1302	1493	1489	1390	1466	1704	1241	1361	1695	1249	1643	1663	1344	1534	1914	1932	1412	1755	1691
222.16136 Da 491.18 s	8.19	223.169		C14H22O2	0	0	430	0	0	0	435	0	423	0	0	0	0	543	0	0	0	0	0	0	5172	4679	5053	5233	4775	5900	4789	5069	5070	4381	4731	4245	4231	3239	3672	3605	3825	3635	3459	3286
100.08679 Da 495.24 s	8.25	101.094			2946	2839	410	2909	2731	3059	2705	2891	363	2955	0	2500	2796	338	2845	2891	2978	2853	2611	2728	1126	1120	1251	1151	1505	1263	3366	1130	1171	1244	1315	1185	1044	1072	1049	1160	1066	972	1174	1176
252.17059 Da 501.63 s	8.36	253.178		C11H20N6O	345	350	291	338	225	313	343	350	318	0	0	235	366	0	0	0	0	0	377	0	1121	1203	1220	1157	1178	0	1159	1332	1203	1231	1223	1086	0	1387	1210	1223	1389	1408	1223	1446
200.10874 Da 504.50 s	8.41	201.116		C11H12N4	5274	4699	0	4443	4944	4434	4395	4272	0	4350	0	4929	4518	0	4530	4854	4638	4468	4321	4452	182	0	0	182	0	0	0	0	0	0	0	0	0	0	0	0	0	0	0	0
185.21402 Da 507.54 s	8.46	186.221		C12H27N	3157	2993	0	2836	2712	2731	2988	3089	0	3135	0	3252	2915	0	3334	0	2902	3075	2987	2830	281	270	305	455	290	249	274	299	270	342	393	272	254	236	287	507	313	240	473	284
504.20584 Da 513.69 s	8.56	253.11			0	0	0	0	0	0	0	259	0	0	0	396	0	0	0	321	0	0	0	0	2443	2191	2131	2496	2047	0	1995	1807	2076	2188	2469	2116	2142	2173	2269	2104	1935	1777	2082	2198
223.17827 Da 519.12 s	8.65	224.186		C10H25NO4	986	0	943	0	708	944	0	0	800	767	860	955	0	879	0	1001	973	857	0	877	4238	10126	2330	8054	3943	5445	2744	2945	1220	2696	1025	7200	4633	4096	5386	1014	3202	2967	7172	6750
332.12862 Da 547.03 s	9.12	167.072		C12H21N4O5P	19082	20145	0	18954	17972	18533	18746	19802	0	19640	0	19144	19553	0	19865	18869	19661	19107	19314	19204	1379	1392	1259	1503	1425	0	1736	1353	1527	1396	1453	1452	0	1213	1396	1315	1602	1435	1367	1238
165.07477 Da 547.54 s	9.13	166.082		C4H11N3O4	169977	170727	0	176124	175655	175588	175670	175845	0	179923	0	178923	179166	0	181641	180847	182513	181449	181479	182965	202	0	262	0	212	0	193	189	0	299	309	220	244	171	0	265	222	172	228	176
190.09394 Da 565.95 s	9.43	191.101		C8H10N6	0	0	0	0	0	0	0	0	0	0	0	0	0	0	0	0	0	0	180	0	1341	1238	1452	1125	1605	1454	1294	1114	1333	1270	1227	1126	1146	1051	1319	1332	1230	1168	1271	1257
230.12723 Da 566.34 s	9.44	231.135		C11H14N6	0	0	0	0	0	0	0	483	0	0	0	452	477	0	479	393	386	534	436	442	1974	1796	2052	2083	1903	2130	1943	1794	1785	1866	1850	1756	1857	1919	1813	1679	1703	1689	1852	1642
142.09701 Da 567.58 s	9.46	143.104		C8H14O2	897	747	0	861	688	1046	687	1038	0	1008	0	1010	683	0	674	929	1031	1009	1130	1083	0	1304	1304	1368	1587	1537	1534	1614	1402	1303	1031	1151	1509	1159	1280	1129	1526	1405	1409	1298
233.17817 Da 579.50 s	9.66	234.185		C15H23NO	0	0	0	172	171	0	0	168	0	0	101	0	159	0	129	140	0	166	0	0	1225	1498	1328	1186	1164	1282	1332	1365	1141	1277	1358	1193	1161	1170	1376	0	1264	1198	1079	1322
159.03192 Da 584.11 s	9.74	160.039		C4H5N3O4	1638	1406	0	1089	771	1501	1929	1214	0	982	0	2716	2541	0	1536	4341	2972	2623	3015	2099	3018	4976	3873	1708	2449	0	3716	3936	1605	3409	2365	2372	3863	826	1381	1680	3148	1394	1727	1700
177.09064 Da 586.74 s	9.78	178.098		C9H11N3O	0	0	0	0	0	0	0	0	0	0	0	0	0	0	0	0	0	0	0	0	3521	3326	3800	3583	3750	3675	3643	3910	2999	3587	3716	3207	3106	2891	3078	3369	3121	3023	3027	3035
162.02915 Da 602.75 s	10.05	163.036		C9H6O3	1032	835	0	920	975	1045	856	942	0	835	0	1005	1067	0	915	832	1126	958	935	876	1435	1496	1505	1614	1767	1393	1469	1366	1509	1472	1586	1660	1283	1335	1540	1244	1613	1200	1335	1365
216.03722 Da 602.80 s	10.05	217.044		C7H8N2O6	0	0	0	0	0	0	0	0	0	0	0	0	0	0	0	0	0	0	0	0	1642	1692	1849	1565	1637	1578	1749	1814	1844	1804	1802	1785	1728	1810	1941	1774	2051	1817	2048	1668
298.10491 Da 605.55 s	10.09	299.112		C10H14N6O5	0	0	0	0	0	0	0	0	0	0	0	0	0	0	0	0	189	260	0	0	0	2553	2095	3141	2247	0	1815	2700	1412	2017	1283	2090	0	2559	2514	1246	1996	3834	2180	2730
143.12990 Da 611.45 s	10.19	144.137		C8H17NO	437	275	0	451	343	450	489	345	144	285	131	379	404	194	412	457	389	359	470	592	0	4365	4270	4217	3935	3599	4155	3790	4210	3934	4058	3847	3825	3520	3716	3767	3605	3492	3411	3800
241.13679 Da 623.86 s	10.4	242.144	Terbutryn	C10H19N5S	0	0	0	0	0	0	0	561	0	0	0	500	911	0	714	995	950	960	962	647	5652	5552	5603	6144	6219	5682	5544	5149	5436	5217	5561	5216	5000	4523	5105	5427	5131	5115	5848	6098
171.15907 Da 627.73 s	10.46	172.166		C10H21NO	5572	5621	0	5579	6027	5905	5486	5597	0	5887	0	6194	5479	0	6025	5826	6273	5569	5707	5495	0	0	0	0	0	0	0	0	0	0	0	0	0	0	0	0	0	0	0	0
228.13439 Da 628.58 s	10.48	229.142		C8H24N2OS2	0	0	0	0	561	0	0	606	0	641	0	588	522	0	569	595	569	607	728	552	1384	1215	1267	1272	1211	1446	1379	1283	1135	1176	1633	1305	1101	901	931	929	1126	1075	947	1220
182.09088 Da 639.52 s	10.66	183.098		C6H10N6O	648	412	964	539	495	511	614	598	946	542	1025	684	427	1152	625	520	559	573	615	769	3047	2842	3278	2722	3196	1150	3201	2521	2737	3731	3231	4129	3665	2935	3188	4591	4723	3392	3912	3915
204.14055 Da 639.98 s	10.67	205.148		C8H20N4S	3616	3638	0	3447	3395	3208	3816	3536	0	3694	0	3238	3537	0	3229	3429	3303	3327	3496	3201	0	0	0	229	267	0	358	0	0	0	313	0	0	0	0	0	0	0	0	0
86.03889 Da 640.09 s	10.67	87.0462			2683	2623	410	2377	2784	2318	2734	2443	531	2802	523	2629	2672	619	2823	2652	2637	2771	2630	2608	15048	0	15427	15100	0	14469	0	12800	11735	10345	8425	0	12772	13985	13381	0	0	0	13656	13003
273.26769 Da 649.64 s	10.83	274.275		C16H35NO2	0	0	0	0	0	0	0	0	0	0	0	0	0	0	0	0	0	0	0	0	0	104614	104823	76897	88954	0	89964	96319	69134	76225	105413	77272	0	55777	72285	51804	91056	62665	80834	55989
191.13109 Da 658.70 s	10.98	192.138	diethyltoluamide	C12H17NO	7569	6492	0	6895	6099	7604	7090	6748	0	6671	0	7155	6848	0	7041	7688	7271	7224	7439	7318	1503	1713	2018	1441	1732	1610	1968	1457	1640	1537	2037	1668	1131	1541	1505	2663	1185	1193	1383	1374
179.09296 Da 666.02 s	11.1	180.1		C10H13NO2	25573	25572	0	26228	25612	27202	26133	26806	0	25232	0	25764	23345	0	26925	25969	26191	27535	26767	27408	501	360	416	333	311	359	298	271	301	406	359	377	387	0	374	332	428	411	333	334
199.22949 Da 667.46 s	11.12	200.237		C13H29N	0	0	0	731	0	831	0	1039	0	667	0	1039	1090	0	1170	1307	1035	711	937	1667	1336	1645	1257	1329	1392	1353	1373	1457	1595	1515	1764	1551	1256	1294	1229	1287	1559	1132	1375	1416
287.28399 Da 669.55 s	11.16	288.291		C17H37NO2	0	0	0	0	0	0	0	0	0	0	0	0	0	0	0	732	658	218	0	243	0	6198	6245	5571	6044	0	5907	5921	5409	5415	5343	6135	0	4960	5706	5419	6047	5240	5538	5212
243.25687 Da 671.19 s	11.19	244.264		C15H33NO	0	0	0	0	0	0	0	0	0	0	0	200	220	0	0	175	192	363	188	231	1647	1588	1388	1430	1299	1497	1483	1891	1246	1111	1542	1342	1231	1181	1187	1220	1955	1348	1171	1284
213.24597 Da 678.39 s	11.31	214.253		C14H31N	0	0	0	0	0	0	0	3876	0	0	0	4719	5504	0	3014	3157	3211	3162	3498	11598	6608	7800	9340	7792	6813	6412	6434	5862	8345	6350	7178	7223	5748	5841	5778	7900	6424	5767	6278	7366
240.02259 Da 678.79 s	11.31	241.03		C6H4N6O5	0	0	0	0	0	0	0	0	0	0	0	0	0	0	0	0	0	0	0	0	1035	1148	1183	1191	1112	1283	1293	1177	1102	1166	1248	1067	1074	1157	1243	1461	1103	1147	1147	1168
227.26215 Da 683.43 s	11.39	228.269		C15H33N	0	0	0	0	0	0	0	0	0	0	0	1252	0	0	0	1584	1679	1315	0	1498	1914	2105	1671	0	1741	2163	1618	1723	1491	1691	4669	1710	1610	1422	1557	1581	2225	1578	1469	1825
271.17979 Da 685.70 s	11.43	272.187		C14H25NO4	0	0	0	0	0	0	0	0	0	0	0	0	0	0	0	0	0	0	0	0	0	2569	2283	2275	2075	0	2087	2145	2047	1908	1907	3974	0	7440	1783	7624	1724	1670	1859	1950
229.24108 Da 687.90 s	11.47	230.248		C14H31NO	0	0	0	0	0	0	0	0	0	0	0	0	0	0	0	1775	2088	2386	0	0	1457	1353	1326	1364	1430	1341	1485	1367	1320	1423	1592	1528	1299	0	1445	1192	1421	1314	1388	1163
208.15175 Da 691.54 s	11.53	209.159		C7H20N4O3	21178	19999	0	20367	20219	21059	20478	20773	0	20394	0	21022	21821	0	20574	20345	20954	20712	20295	21134	790	850	778	975	913	766	900	783	827	797	887	778	798	670	855	817	733	669	670	759
192.11629 Da 691.89 s	11.53	193.124		C12H16O2	2776	2893	0	3158	3518	2755	2957	3226	0	3068	0	2952	3153	0	3305	3207	2944	3176	3217	3192	354	0	0	0	241	286	0	0	229	225	0	287	185	349	220	318	0	297	189	0
274.20016 Da 696.50 s	11.61	275.207		C12H26N4O3	2343	2710	0	2458	2527	2302	2335	5333	2379	2317	2294	5161	4785	2483	4677	4912	5031	4796	5423	4745	0	0	0	0	0	0	0	0	0	0	0	0	0	0	0	0	0	0	0	0
164.08141 Da 698.79 s	11.65	165.089		C10H12O2	401	470	0	407	398	446	378	498	0	0	0	768	656	0	972	997	869	657	867	965	1373	1369	1423	1340	1704	2112	1670	1586	1260	1360	1128	1251	1415	1323	1186	1220	1488	1379	1587	1393
171.16011 Da 699.84 s	11.66	172.167		C10H21NO	800	829	0	831	960	1146	895	912	0	957	0	912	846	0	971	1051	831	1078	937	771	1590	1297	1347	1246	1356	1437	1171	1213	1261	1288	1332	1449	1142	1196	1090	1265	1202	1026	1137	1153
342.28948 Da 703.49 s	11.72	343.297		C19H38N2O3	617	0	0	675	691	599	0	0	0	659	0	0	0	0	0	0	0	0	0	0	0	2142	0	0	2052	0	1916	1885	1767	2067	1896	1864	0	0	1900	2096	0	1928	2073	1893
104.06152 Da 708.19 s	11.8	105.069		C8H8	0	0	698	0	0	137	0	0	553	0	688	0	0	489	0	0	0	0	0	0	2383	2910	2604	2592	2494	4264	2240	3224	2700	2106	3379	3843	4664	3391	2073	4423	2777	1714	2047	2046
176.08130 Da 708.25 s	11.8	177.089	5,6,7,8-tetrahydro-2-Naphthoic Acid	C11H12O2	3716	3881	5748	3976	4086	4117	3947	4141	5644	4056	5195	3819	3647	5539	3966	3956	4200	4010	4239	3945	0	0	0	0	0	0	0	0	0	0	0	0	0	0	0	0	0	0	0	0
266.11628 Da 708.37 s	11.81	267.124		C14H18O5	0	0	0	0	0	0	0	0	0	0	0	0	0	0	0	0	0	0	0	0	0	2299	2253	2224	2075	0	1765	2706	2056	2036	2668	2719	0	2271	1467	3414	2021	1117	1593	1497
244.07185 Da 713.90 s	11.9	245.079		C10H8N6O2	0	0	0	0	0	0	0	639	0	0	0	734	651	0	675	682	739	782	660	687	3408	3889	3902	3790	4323	3980	3814	3213	4136	3679	4681	4025	3490	4145	4027	3580	3643	4060	4160	3581
176.04492 Da 713.93 s	11.9	177.052		C10H8O3	5638	5349	0	5440	5018	5228	5371	5344	0	5608	0	5617	5200	0	5009	5608	5003	5357	5343	5214	2528	2286	2417	2280	2424	2277	2378	2023	2244	0	2536	2215	1965	2209	2124	1694	2181	2253	1958	2095
208.14624 Da 717.60 s	11.96	209.154		C13H20O2	0	0	0	0	0	0	0	160534	0	0	0	161278	167932	0	164741	160473	163558	160797	160555	162956	3945	4261	3784	3925	3558	3651	3605	4056	3605	3599	4162	3759	3563	3724	3482	3402	3571	3540	3840	3864
202.10320 Da 719.05 s	11.98	203.11		C7H14N4O3	10084	8246	0	9982	10659	10486	10658	11870	0	9785	0	11043	10596	0	10873	11259	12022	12664	12267	12250	665	434	616	378	704	541	335	807	718	710	399	628	460	427	374	319	518	615	324	411
160.08468 Da 722.10 s	12.04	161.092		C6H12N2O3	16033	11922	0	17091	16546	17691	14238	17546	0	17335	0	18699	18246	0	18459	19905	20848	20442	20028	20658	1158	888	1208	1139	1207	1070	814	1075	1104	804	955	860	1068	936	1033	981	955	890	1027	833
311.21153 Da 725.56 s	12.09	312.219		C11H30N5O3P	0	0	0	0	0	0	0	75343	0	0	0	77626	78541	0	76923	78418	75929	77929	78353	76227	1160	2468	0	2402	2283	1424	2436	2224	2055	1897	2044	1609	0	1872	1716	1449	1595	1413	1450	1803
194.13163 Da 742.74 s	12.38	195.139		C12H18O2	2107	1946	0	2198	2264	2191	2196	2057	0	2111	525	2045	1965	18064	2136	2159	2152	1979	2068	2283	490	728	630	689	545	538	1036	549	630	692	616	491	563	543	577	487	471	514	586	523
241.27756 Da 745.72 s	12.43	242.285		C16H35N	0	0	0	0	0	0	0	0	0	0	0	0	0	0	0	0	0	0	720	0	2130	1941	2029	2283	2096	2108	1952	1954	1940	2003	2266	1976	1876	1804	2110	1750	2147	1793	1801	1816
180.11337 Da 747.07 s	12.45	181.121		C11H16O2	3150	2928	0	3330	3286	3394	3126	2989	0	3426	0	3076	3115	0	3482	3266	3649	3334	3205	3215	605	548	476	554	785	556	548	597	587	622	558	564	562	483	498	663	682	575	559	552
303.29485 Da 748.36 s	12.47	304.302	BENZALKONIUM	C21H37N	0	0	0	0	0	0	0	0	0	0	0	0	0	0	0	0	0	0	0	0	0	2670	2405	2266	2348	0	2431	1988	2344	2744	3003	2297	0	2279	2319	2532	2425	2245	2471	2080
193.11166 Da 751.37 s	12.52	194.119		C11H15NO2	142095	144913	0	144759	145879	143117	142970	146854	0	143747	0	142239	145556	0	139407	141371	140812	140368	141805	144643	1879	1975	1710	1675	1912	2001	2046	1592	1713	1671	1888	1665	1776	1461	1391	1623	1583	1492	1761	1739
255.29344 Da 753.67 s	12.56	256.301		C17H37N	0	0	0	0	0	0	0	0	0	0	0	0	0	0	0	0	8480	0	0	0	138096	136768	135458	133449	135805	0	138661	127651	133438	137757	137377	125354	128941	127354	136371	129242	131869	126822	128084	132668
182.07211 Da 761.17 s	12.69	183.079	Xanthan	C13H10O	67712	68459	0	69751	72681	72317	70266	73055	0	71489	0	74238	72793	0	72935	72049	76503	75738	76659	80180	1840	1920	1864	1783	1795	1639	1737	1617	1534	1607	1717	1496	1384	1173	1150	1378	1418	1282	1067	1286
297.26823 Da 762.06 s	12.7	298.276		C18H35NO2	0	0	456	0	0	0	0	0	0	0	0	216	0	267	0	0	239	0	0	0	0	1672	1779	1552	1837	0	1412	1560	1516	1479	1575	1322	0	1154	1408	1404	1481	1294	1271	1295
408.17985 Da 762.96 s	12.72	205.097		C16H25N8O3P	688	592	785	524	590	700	587	571	854	809	816	608	639	0	737	705	637	734	738	782	1938	1907	2177	1830	2204	2480	1974	1722	1845	2481	1906	2062	1976	2237	0	1923	1911	1776	1926	1909
148.08580 Da 768.38 s	12.81	149.093		C10H12O	1512	882	0	1437	1786	1627	0	1727	0	1618	0	1647	1772	0	1655	1691	1700	1752	1493	2157	993	1275	1392	1266	1141	1302	1308	1261	1222	1255	1404	1153	1064	1154	1340	1332	1242	1189	1442	1246
263.09906 Da 770.49 s	12.84	264.106		C6H13N7O5	0	0	0	0	0	0	0	0	0	0	0	0	0	0	0	0	0	0	0	0	0	1355	1358	1357	1264	0	1447	0	1557	1494	1567	1123	1285	1130	1134	1227	1304	1245	1075	1247
208.14517 Da 771.95 s	12.87	209.152		C9H16N6	0	0	0	0	6646	6769	7184	7439	0	7674	0	7338	7501	0	7622	7623	8105	7387	7883	8224	1564	1645	1518	1635	1549	1681	1404	1334	1405	1471	1444	1295	1228	1262	1259	1247	1416	1058	1295	1565
240.17126 Da 773.26 s	12.89	241.179		C10H20N6O	0	0	0	0	0	0	0	0	0	0	0	0	0	0	0	18454	18701	17957	0	0	1291	1150	1326	1442	1408	1324	1352	1235	1135	1433	1535	1332	1308	1315	1289	1352	1163	1280	1263	1270
182.09266 Da 775.43 s	12.92	183.1		C10H14O3	3166	2543	3152	0	0	0	3202	0	2583	0	3010	0	0	2983	0	0	0	0	0	0	1689	1810	1716	1863	1882	1543	1626	1706	1753	1647	1597	1801	1899	1600	1558	1587	1804	1648	1639	1735
102.02851 Da 778.17 s	12.97	103.036		C3H6N2S	12514	11695	0	12889	12219	12484	11397	11837	0	12288	0	12560	13077	0	12405	12172	12752	12321	12194	11841	0	0	0	0	0	0	0	0	0	0	0	0	0	0	0	0	0	0	0	0
328.22455 Da 778.82 s	12.98	329.232		C14H28N6O3	0	0	0	0	0	0	0	0	0	0	0	0	0	0	0	0	0	380	0	0	0	1661	0	1505	1417	0	1526	1549	1458	1614	2001	1383	0	0	1387	1407	1612	1353	1378	1514
292.20333 Da 780.42 s	13.01	293.211		C14H24N6O	827	730	0	533	623	639	538	730	1436	654	559	705	582	875	514	636	768	852	642	567	1989	2270	1872	1999	1980	1811	2079	1772	2056	2268	1919	1981	2118	2062	2507	1929	2176	2143	2376	2343
348.17907 Da 781.16 s	13.02	175.097		C11H25N8O3P	219	169	0	260	0	0	0	0	0	0	0	144	0	0	239	184	0	0	0	0	1425	1512	1376	1622	1390	1298	0	1705	1499	1970	1541	1542	1290	1435	1535	1466	1424	1368	1421	1588
388.21237 Da 781.17 s	13.02	195.113		C13H33N4O7P	0	1007	129	987	0	1153	897	1471	0	0	0	0	1652	0	0	0	886	0	0	1362	1726	1912	2126	1840	1678	0	1648	1713	1991	2022	1985	2028	1768	1628	1932	1864	2017	1772	2075	1761
336.23042 Da 781.99 s	13.03	337.238		C20H32O4	0	0	0	0	0	0	0	0	0	0	0	0	0	0	0	0	0	0	0	0	0	9259	0	0	8777	0	8406	8740	9042	9424	9439	8575	0	8541	8989	9695	9120	9159	8569	9212
190.17093 Da 782.11 s	13.04	191.178		C14H22	641	744	391	882	734	694	918	849	216	739	326	836	663	296	897	749	612	765	666	775	3034	3309	2579	2591	2705	2342	2828	2197	2276	2296	2652	2116	2219	1964	2130	2140	2047	1939	2088	2031
194.09720 Da 784.76 s	13.08	195.104		C11H14O3	1218	1122	0	931	1077	1146	0	1111	0	1038	0	982	1011	0	1123	1096	1199	942	1096	1038	872	1372	1130	918	885	1214	979	938	1084	907	0	1030	0	831	979	1034	0	973	1025	1061
197.17714 Da 785.11 s	13.09	198.184		C12H23NO	545	440	0	433	399	590	687	498	0	411	0	672	566	0	1676	1822	1711	540	471	501	1106	1053	1123	1207	1211	1198	1110	1156	1054	1135	1197	1078	997	1093	936	1076	999	1092	1305	1107
252.13479 Da 788.65 s	13.14	253.142		C10H16N6O2	0	0	0	360	0	0	0	333	0	0	0	457	413	0	392	510	456	493	404	345	1330	1364	1292	1320	1488	0	1513	1284	1111	1337	1458	1211	1151	1122	1016	1023	1092	1229	0	1108
204.15565 Da 788.73 s	13.15	205.163		C8H20N4O2	7793	8136	0	7987	7706	8159	8634	8710	0	8650	0	8499	9000	167	8154	9184	8492	8388	8387	8625	0	0	0	0	148	220	0	0	0	209	0	0	0	0	0	0	141	98	0	0
185.17693 Da 792.95 s	13.22	186.184		C11H23NO	1849	1527	0	1445	871	1319	1638	1559	0	1004	0	1595	1884	0	995	1049	1525	1179	1777	1705	1716	1532	1564	1925	1495	1628	1492	1351	1595	1478	1694	1826	1269	1338	1466	1656	1357	1376	1699	1540
233.15447 Da 795.26 s	13.25	234.162		C13H19N3O	0	0	0	0	0	0	0	0	0	0	0	0	0	0	0	0	418	0	0	0	1736	1858	1686	1753	1856	1811	1786	1702	1736	1696	1961	1593	0	1595	1589	1558	1613	1683	1696	1719
374.19568 Da 803.07 s	13.38	188.105		C13H27N8O3P	227	170	0	218	154	0	0	179	0	293	0	197	124	0	204	0	167	232	294	169	2049	1940	2121	1987	1940	2163	2107	1857	1492	2125	2437	2101	0	1369	1343	0	1290	1934	1284	1590
353.27906 Da 803.16 s	13.39	354.286		C17H39NO6	0	0	0	0	0	0	0	0	0	0	0	0	0	0	0	0	0	0	0	0	0	148898	0	0	143612	0	160840	143031	119941	127157	189587	165602	0	0	81705	97179	0	119860	100356	112197
102.06641 Da 803.42 s	13.39	103.074		C5H10O2	8255	8220	433	8216	7142	7559	7097	7878	366	7429	364	7145	7255	0	7524	7083	6960	6617	7013	7003	3866	3416	3903	3501	3700	3921	3789	3431	2915	3103	5115	4112	2792	2256	2052	3023	2707	2751	2549	2913
208.14655 Da 806.90 s	13.45	209.154		C13H20O2	0	0	1184	0	0	0	0	22619	1119	0	1275	21320	21122	1442	21005	20741	21557	21313	21235	20826	1461	1264	1385	1279	1295	1460	1326	1160	1306	1269	1275	1594	1371	1152	1371	1293	1130	1246	1411	1234
477.35099 Da 807.04 s	13.45	478.358		C23H43N9O2	6400	6250	6301	6854	6964	6888	6856	6828	6711	6497	6661	6570	6112	6299	6619	6926	6690	6425	6118	7110	1834	0	0	0	0	0	0	0	0	0	0	0	0	1535	0	0	0	0	0	0
316.20607 Da 807.45 s	13.46	317.213		C10H24N10O2	1662	1937	1836	1733	1861	1868	1961	2654	1870	1733	1964	3041	2870	1870	2917	0	0	0	3015	0	0	0	0	0	0	298	0	0	0	0	0	0	0	0	0	312	0	0	0	0
106.03739 Da 809.58 s	13.49	107.045	Benzaldehyde	C7H6O	152025	154150	0	151771	153720	148751	163035	160991	0	161713	0	158220	164218	0	160868	174932	0	167390	165915	173867	6072	6719	6506	6797	6718	6486	6542	5628	5210	4669	4372	4361	4764	5000	5622	5501	5722	5235	5853	5469
166.05889 Da 809.59 s	13.49	167.066	Desaminotyrosine	C9H10O3	97498	98587	0	95346	91931	98950	96988	98831	0	93631	0	94628	97708	0	95166	101539	97772	103234	100473	98900	503	529	0	0	405	338	0	444	0	349	338	0	373	0	0	0	373	320	351	0
283.32535 Da 820.91 s	13.68	284.333		C19H41N	0	0	0	0	0	0	0	0	0	0	0	0	0	0	0	258	198	169	0	0	0	3270	2949	3362	3647	0	2942	2804	3166	2976	3366	0	0	2701	2750	2726	3102	3045	2900	3098
231.16002 Da 823.94 s	13.73	232.167		C10H21N3O3	0	0	0	0	0	0	0	0	0	0	0	0	0	0	0	0	0	0	0	0	1918	1836	1815	1919	1835	1960	1971	1972	2160	1912	1826	1859	1860	1807	2047	1990	2150	1806	1877	2087
461.35813 Da 824.94 s	13.75	462.365		C23H43N9O	5050	4713	5043	5531	5513	5375	5658	0	5776	5711	6128	0	5790	5915	6326	6179	6145	5702	5478	0	752	0	635	0	0	575	0	0	0	0	0	0	0	0	0	0	0	0	0	0
269.19988 Da 826.98 s	13.78	270.207		C15H27NO3	0	0	0	0	0	0	0	0	0	0	0	0	0	0	0	0	0	0	0	0	0	6935	6690	6074	6868	0	6153	6773	5985	5958	6741	5499	0	5729	6141	6147	6609	6051	6796	5889
150.10284 Da 827.03 s	13.78	151.11		C10H14O	0	0	0	208	400	0	0	0	0	0	211	0	0	303	351	281	305	345	0	244	0	1396	1235	1226	1196	1402	1129	1323	1106	1114	1271	1182	1028	1213	1084	1129	1162	1048	1007	1129
232.20404 Da 832.82 s	13.88	233.211		C9H24N6O	770	794	865	881	954	0	711	663	870	700	703	714	798	730	711	740	854	695	0	798	1757	1331	1702	1649	1414	1270	1386	1194	1301	1221	1477	2024	1159	1496	1459	1406	1229	1561	1445	1279
164.07941 Da 844.64 s	14.08	165.087		C5H12N2O4	3040	2993	1601	2903	3210	3101	3159	3023	1975	2854	1704	2943	3092	1728	3265	2934	3464	3514	3198	3562	0	0	0	0	0	0	0	0	0	0	0	0	0	149	0	0	0	0	0	0
180.11337 Da 847.81 s	14.13	181.121		C11H16O2	0	138	0	0	0	0	0	0	0	0	0	184	0	0	0	0	0	179	157	0	1415	1524	1419	1253	1208	1145	1237	1112	1062	1246	1143	1275	1372	1080	1200	1415	1177	1165	1477	1431
408.21773 Da 847.81 s	14.13	205.116		C13H24N14O2	0	0	0	0	0	0	0	0	0	0	0	0	0	0	0	0	0	0	0	0	1141	0	1479	1436	1390	1208	1283	1375	1415	0	1545	1471	1327	1450	1384	1430	1623	1268	1387	1462
364.26169 Da 853.08 s	14.22	365.269		C22H36O4	0	0	0	0	0	0	0	0	0	0	0	0	0	0	0	0	0	0	0	0	0	8263	0	0	9147	0	8128	7946	7617	8218	9470	8090	0	0	7239	7242	0	7140	7727	8277
218.20265 Da 855.28 s	14.25	219.21		C16H26	624	696	876	578	674	599	786	597	0	639	594	523	711	614	641	601	656	648	639	604	1961	1960	2109	1995	2230	1854	1986	2034	2021	1816	2015	1867	1807	1624	1962	1758	2065	1841	1889	1889
203.13026 Da 856.98 s	14.28	204.138		C13H17NO	445	240	249	373	316	384	334	375	0	325	301	345	395	172	325	356	380	411	511	410	1569	1435	1417	1547	1604	1342	1422	1664	1446	1620	1557	1413	1736	1562	1684	1600	1615	1690	1538	1848
208.14628 Da 858.65 s	14.31	209.154		C13H20O2	0	0	0	0	0	0	0	41167	0	0	0	41221	42336	0	41479	43962	42377	44512	42334	44550	2974	3082	3124	3138	2923	2764	2937	2844	2836	3100	2990	2507	2533	2598	2724	2945	2906	2708	2875	2925
293.20059 Da 869.94 s	14.5	294.208		C17H27NO3	0	0	0	0	0	0	0	0	0	0	0	0	0	0	0	0	0	0	0	0	0	5378	5933	5894	6004	0	5955	5523	5343	5793	5627	6115	0	5757	4996	5057	5568	5534	4895	5399
224.17533 Da 883.35 s	14.72	225.183		C14H24O2	522	508	457	0	521	225	601	246	431	488	456	0	0	449	0	0	0	0	0	0	1707	1520	1631	1611	0	1553	1736	1514	1681	1844	1718	1511	1565	0	1775	1788	1642	1394	0	1531
280.16633 Da 884.40 s	14.74	281.174		C12H20N6O2	0	0	0	0	0	0	0	0	0	0	0	0	0	0	0	1721	1734	1596	0	0	0	4433	4221	5201	4684	0	4580	4525	4583	4890	4866	4534	0	3951	5020	4265	4381	4178	4645	4387
212.14144 Da 884.44 s	14.74	213.149		C12H20O3	0	0	0	0	0	0	0	3284	0	0	0	3316	3614	0	3512	3678	3194	3754	3448	3615	1497	1484	1449	1534	1377	1250	1463	1380	1605	1502	1322	1251	1252	1292	1407	1459	1370	1403	1363	1308
160.08600 Da 885.36 s	14.76	161.093		C11H12O	42998	40586	0	44341	44223	40877	45493	45220	0	44870	0	43672	43726	0	45762	44371	44816	46652	42480	44731	1371	1374	1447	1301	1325	1235	1395	1334	1470	1454	1336	1277	1305	1286	1474	1316	1241	1378	1260	1333
326.20923 Da 887.07 s	14.78	327.217		C14H26N6O3	0	0	0	0	0	0	0	0	0	0	0	0	0	0	0	0	0	0	0	0	0	1259	0	1385	1221	0	1202	1239	1259	1265	1529	1304	0	1129	1096	1320	1242	1062	1028	1347
483.45339 Da 887.08 s	14.78	484.461			944	0	0	888	1087	1139	1201	1199	1091	1389	1309	1436	1385	1440	1444	1652	1549	1593	1493	1617	2922	0	0	302	0	4058	0	0	0	0	0	0	0	4443	0	0	0	0	0	0
365.27907 Da 888.57 s	14.81	366.286		C17H40N3O3P	0	0	0	0	0	0	0	0	0	0	0	280	0	0	0	0	0	0	0	305	0	1157	0	0	1141	0	1158	1093	1119	1042	1336	1177	0	0	1267	1107	0	1091	986	1398
395.32493 Da 890.03 s	14.83	396.332		C20H45NO6	0	0	0	0	0	0	0	0	0	0	0	0	0	0	0	0	0	0	154	0	0	4899	0	0	5212	0	5163	4495	4473	4685	5493	4924	0	0	4494	4650	0	4324	4151	0
351.30005 Da 890.37 s	14.84	352.307		C18H41NO5	0	0	0	0	0	0	0	949	0	0	0	986	1016	972	799	871	903	893	838	938	0	3676	0	0	4870	0	4537	4892	3706	3751	4178	4413	0	0	4084	4259	0	3567	3566	4484
106.06080 Da 890.56 s	14.84	107.068		C4H10O3	8099	8731	1474	0	11909	8600	0	8481	1428	12190	1272	10116	0	1454	13039	10074	8655	11319	11017	9183	3835	3290	3617	3697	4422	2545	3578	2846	1961	2067	3590	3877	2511	3569	2326	3197	3111	2553	2062	3452
307.27383 Da 890.59 s	14.84	308.281		C16H37NO4	0	0	0	0	0	0	0	0	0	0	404	0	0	0	489	414	481	0	0	0	0	4029	0	2631	7256	0	4887	6108	2995	2631	5681	4523	0	3713	2018	5653	8092	4061	2260	4552
334.27378 Da 890.66 s	14.84	335.281		C18H38O5	0	0	0	0	0	0	0	0	0	0	0	0	0	0	0	0	0	0	0	0	0	3987	0	0	4885	0	4044	4378	3797	3583	3965	3946	0	3653	3275	3892	4890	3276	3326	4193
222.10106 Da 907.80 s	15.13	223.108		C11H14N2O3	1918	1175	3065	1564	1641	1641	1913	2047	2369	1800	1890	1802	1757	1802	1605	0	0	0	2040	1550	0	834	934	0	941	0	852	872	826	819	791	863	733	0	906	803	830	898	929	897
450.19408 Da 911.81 s	15.2	226.104		C14H22N14O4	0	0	0	0	0	0	0	0	0	0	0	0	0	0	0	0	0	0	140	0	0	1815	1592	1757	1864	1740	1708	1664	1828	2351	1988	1811	1570	1687	1772	1735	1925	1716	1653	2069
204.07903 Da 912.02 s	15.2	205.086		C12H12O3	0	0	0	62235	64381	62701	0	66184	0	61044	0	65303	59934	0	61168	62807	75378	63449	59995	61299	33058	33898	33688	33814	32644	33273	34576	31505	33210	33908	37727	34078	30176	30256	33366	32539	35186	34461	31403	35109
148.01350 Da 912.26 s	15.2	149.021		C8H4O3	47094	44130	0	45469	48504	46094	0	51104	0	46345	0	47492	44548	0	45067	46278	55361	49676	45524	45096	0	25052	24421	25123	26155	24286	27499	23766	25794	25626	25393	23076	22027	22576	24745	23940	26796	21491	24416	25821
206.17171 Da 914.62 s	15.24	207.179		C8H22N4O2	9902	9142	0	10338	9830	9879	10302	9606	0	10256	280	9752	10423	0	9780	10319	10103	10091	10660	9936	483	529	434	483	553	492	493	472	442	392	494	410	433	390	412	445	478	467	420	431
340.28053 Da 915.16 s	15.25	341.288		C24H36O	0	0	0	0	0	0	0	0	0	0	0	0	0	0	0	0	0	0	0	0	0	10409	0	0	9452	0	9399	9108	9302	9580	9840	10072	0	0	8855	9042	0	9219	9059	9060
236.17635 Da 928.01 s	15.47	237.184		C15H24O2	12554	12682	942	772	715	1114	12480	0	866	855	12180	0	449	12096	0	449	314	0	0	0	1045	1287	1314	1288	0	1058	1031	1084	1215	1313	1263	1072	961	1095	1105	1138	1170	1102	1106	1099
267.07594 Da 938.17 s	15.64	268.083		C9H5N11	0	0	0	0	0	0	0	0	0	0	0	0	0	0	0	0	0	0	0	0	0	1749	1652	1657	1620	0	1475	1478	1417	1565	1697	1323	0	1131	1089	1315	1123	1125	1035	1231
338.26509 Da 939.62 s	15.66	339.272		C14H30N10	0	0	0	0	0	0	0	0	0	0	0	0	0	0	0	0	0	0	0	0	0	2729	0	0	2673	0	2787	2747	2670	2942	2845	2937	0	0	2745	2484	2522	2389	2463	2645
453.44733 Da 940.98 s	15.68	454.455		C20H55N9O2	1617	1338	1499	1570	1476	1841	1804	0	1506	1599	1604	0	1680	1813	1657	1751	1823	0	1899	0	0	0	4185	0	0	0	0	0	0	0	0	0	0	0	0	0	0	0	0	0
304.29021 Da 942.03 s	15.7	305.297		C20H36N2	1057	1194	1163	1180	1233	1209	1043	3886	1037	1132	1175	4465	3860	1019	3839	4219	4107	3932	4012	4219	4438	0	0	0	0	3978	0	0	0	0	0	0	0	0	0	0	0	0	0	0
409.34033 Da 943.52 s	15.73	410.348		C21H47NO6	0	0	0	0	0	0	0	0	0	0	0	0	0	0	0	0	0	0	0	0	0	4292	0	0	4614	0	4659	4792	5582	5117	5883	5357	0	0	5187	6046	0	4929	5301	0
348.28882 Da 944.87 s	15.75	349.296		C19H40O5	0	0	0	0	0	0	0	0	0	0	0	0	0	0	0	0	0	383	0	0	0	2834	0	0	3198	0	2746	2640	3256	3214	3418	3037	0	0	2675	2862	0	2648	2709	2790
303.24245 Da 963.47 s	16.06	304.25		C17H29N5	0	0	0	0	0	0	0	0	0	0	0	0	0	0	0	0	0	0	0	0	0	1781	1740	1794	1716	0	1760	1737	1487	1540	1876	1630	0	1452	1873	1458	1718	2075	1520	1539
198.16264 Da 963.55 s	16.06	199.17		C12H22O2	15547	14171	0	15903	14441	14967	0	15411	0	14678	0	14246	13706	0	14451	15064	14783	14582	15498	14292	4458	4813	5223	4890	4780	4095	4311	4380	4228	4465	4615	4245	3868	4032	4132	4238	4499	4153	4178	4440
110.10781 Da 963.57 s	16.06	111.115		C8H14	7256	0	168	7693	7525	7594	0	8186	0	8182	0	7469	7437	0	7742	7936	7390	7528	8071	7798	2031	2161	2323	2295	1767	2007	2193	1942	1967	2153	2298	1966	2022	1773	2079	1835	1906	2096	2163	1744
484.35792 Da 980.71 s	16.35	485.365		C28H52O4S	0	0	0	8188	7975	6629	7200	8597	7348	7877	8510	24421	27888	24682	0	36951	31711	24797	28855	22756	8528	0	0	0	0	49514	0	0	0	134	0	0	0	4986	0	0	5980	0	0	0
501.31027 Da 981.11 s	16.35	502.318		C29H43NO6	0	0	0	0	0	0	0	0	0	0	0	0	0	0	0	0	0	0	0	0	0	18254	0	0	4089	0	8421	10594	15440	6690	10064	18325	0	0	10320	5534	0	3524	0	0
484.28328 Da 981.14 s	16.35	485.291		C23H36N10S	0	0	0	0	0	0	0	0	0	0	0	0	0	0	0	0	0	0	0	0	0	19423	0	0	4059	0	9860	11423	17402	6699	9788	19616	0	0	10088	5854	0	3456	0	0
479.22768 Da 991.40 s	16.52	480.235			0	3834	0	3444	2449	2634	2483	2443	2562	2320	2091	2115	2110	2061	2176	1854	2172	1815	2200	1811	1085	0	918	0	0	0	0	0	0	0	0	0	0	865	0	0	947	0	0	0
318.27897 Da 996.96 s	16.62	319.286		C18H38O4	0	0	0	176	0	201	185	0	129	0	272	0	0	0	0	0	0	0	0	0	0	6600	0	6077	6408	0	6270	6753	6429	6638	7167	6489	0	5877	6347	6563	7627	6952	6655	7211
296.28835 Da 997.09 s	16.62	297.296		C12H36N6O2	2107	1893	2172	2136	2473	2274	2143	1083	2133	2746	2169	1307	1467	2494	1317	1312	0	1286	1357	0	0	0	0	0	0	0	0	0	0	0	0	0	0	0	0	0	0	0	0	0
106.06083 Da 997.84 s	16.63	107.068		C4H10O3	1174	1221	593	1381	1969	1412	0	1325	595	2058	565	1567	1649	671	2161	1906	1478	1909	1777	1311	2704	2359	2494	2850	2868	3407	2995	2707	2583	2806	2994	3019	3082	2659	2911	2840	3437	3257	2687	2931
291.27875 Da 998.15 s	16.64	292.286		C16H37NO3	0	0	0	0	0	0	0	0	0	0	0	0	0	0	0	682	670	749	0	0	0	3314	3600	3582	4225	0	3584	4012	3470	3824	4005	3754	0	3673	3816	4010	4604	3927	3973	4031
332.27279 Da 1002.10 s	16.7	333.28		C12H32N10O	0	0	0	0	0	0	0	0	0	0	0	0	0	0	0	0	0	0	0	0	0	1637	0	0	1803	0	2150	2318	2084	2238	2703	2412	0	2385	2602	2384	2771	2970	2763	3158
367.41946 Da 1003.86 s	16.73	368.427		C25H53N	0	0	0	0	0	0	0	0	0	0	0	0	0	0	0	0	0	0	0	0	0	6891	0	0	8207	0	7142	6577	6694	7393	6837	6927	0	0	6498	6516	0	6456	5964	6267
252.20721 Da 1004.44 s	16.74	253.214		C12H24N6	0	0	0	0	0	0	0	226	0	0	0	212	0	0	302	235	0	214	342	0	1557	1749	1738	1725	1623	636	1481	1764	1885	1561	1766	1602	1826	1667	1664	1740	1981	1725	0	1838
227.22568 Da 1006.48 s	16.77	228.233		C14H29NO	244	0	285	0	0	0	0	0	0	0	0	0	0	0	2740	3824	3421	3400	0	3459	1218	1165	1139	1207	1104	1275	1539	1100	0	1227	1311	1137	1097	1120	1315	1231	1313	1221	1298	1248
249.08061 Da 1018.13 s	16.97	250.088		C16H11NO2	0	0	0	0	0	0	0	0	0	0	0	0	0	0	0	1919	2000	1853	0	0	1124	1066	1361	1069	1356	0	0	1010	1256	1156	1164	1243	1147	1222	1099	949	1029	996	1003	1178
378.31139 Da 1020.41 s	17.01	379.319		C20H38N6O	2359	2210	1860	2063	2329	1694	0	1578	1727	2156	1692	1795	1791	2003	1622	1921	1612	0	1677	0	1573	0	1521	0	0	1305	0	0	0	0	0	0	0	0	0	0	0	0	0	0
310.12164 Da 1025.70 s	17.09	311.129		C8H18N6O7	0	0	0	0	0	0	0	0	0	0	0	0	0	0	0	0	0	0	0	0	0	1731	1465	1538	1515	0	1612	1500	1532	1514	2570	1831	1227	1181	1286	1408	1568	1335	1504	1530
553.17016 Da 1056.85 s	17.61	554.177			0	0	0	0	0	0	0	0	0	0	0	0	0	0	0	0	0	0	0	0	0	24280	0	0	23840	0	21743	20959	22714	22048	22216	22369	0	0	20005	19167	0	19431	0	0
370.09580 Da 1056.97 s	17.62	371.103			0	0	0	0	0	0	0	0	0	0	0	0	0	0	0	0	0	0	0	0	0	12645	0	0	12976	0	10443	12085	11192	11002	12130	11342	0	0	10394	10289	0	9621	9392	10062
255.29106 Da 1062.65 s	17.71	256.298		C17H37N	98182	80913	0	76986	88519	101612	92678	0	0	70792	0	0	0	44886	0	716	0	939	0	0	1765	2321	2061	2248	1944	1794	1780	2048	1816	2161	1914	2023	1790	1974	2005	2048	2188	1828	0	1927
281.27266 Da 1063.91 s	17.73	282.28	Oleamide	C18H35NO	0	0	0	0	0	0	0	0	0	0	0	0	0	0	0	0	0	0	0	0	0	10568	11129	9839	11512	0	9867	13435	11016	10613	13808	13294	0	8992	10818	10146	16238	9196	9720	9436
80.02474 Da 1064.48 s	17.74	81.032		C5H4O	1722	2058	1908	1706	1850	1860	2065	2146	1935	1824	1918	1954	2071	1845	1694	2112	1735	1850	1733	1763	0	15409	14603	14557	14815	15337	14743	15155	15984	17207	0	14430	13315	12084	14388	0	15400	13116	14510	14884
293.20073 Da 1078.95 s	17.98	294.208		C17H27NO3	0	0	0	0	0	0	0	0	0	0	0	0	0	0	0	0	0	0	0	0	0	3585	3576	3675	3835	3473	3603	3705	3392	3451	3634	3502	3422	3474	3588	3748	3761	3556	3675	3723
583.46678 Da 1079.53 s	17.99	584.474		C31H61N5O5	0	0	0	2030	1220	0	0	0	0	2332	0	0	0	0	0	0	0	0	0	0	0	3149	0	0	2849	0	2962	2839	3119	3042	3053	2690	0	0	2894	2882	0	0	0	0
451.46734 Da 1082.36 s	18.04	452.475		C21H57N9O	3097	2630	2837	2623	2464	2817	3866	0	2643	2932	2715	0	3247	2290	2156	2124	2492	0	2265	0	0	0	3410	0	0	0	0	0	0	0	0	0	0	0	0	0	0	0	0	0
302.28356 Da 1088.14 s	18.14	303.291		C18H38O3	326	379	448	354	517	0	360	0	302	462	306	0	0	0	0	0	0	0	0	0	0	2439	2202	2415	2603	401	2525	2704	2418	2526	2686	2811	0	2632	2783	2784	2906	2669	2685	2717
294.19115 Da 1100.00 s	18.33	295.198		C12H30N4S2	442	0	0	0	0	0	0	0	0	0	0	0	0	0	0	746	747	819	0	733	0	1412	1346	1339	1472	0	1251	1321	1337	0	1288	1260	0	1127	1334	1441	1319	1231	1261	1406
370.09594 Da 1106.35 s	18.44	371.103			0	0	0	0	0	0	0	0	0	0	0	0	0	0	0	0	0	0	0	0	0	6121	0	0	5275	0	5012	5281	5262	5686	5270	5355	0	0	4453	4612	0	4726	4721	4666
222.05815 Da 1106.42 s	18.44	223.065		C9H18S3	0	0	0	0	0	0	0	1385	0	0	0	1550	1493	0	1741	1612	2059	1752	1913	1737	1549	1582	1435	1378	1566	2406	1336	1374	1546	1412	1390	1425	1115	1359	1204	1169	0	1124	1385	1210
240.06252 Da 1106.44 s	18.44	241.07			0	0	0	0	0	0	0	0	0	0	0	0	0	0	0	3733	3838	4258	0	0	3365	3175	2883	3375	3284	4778	3324	2887	3353	3413	3252	2992	2827	3082	2995	2851	2706	2895	2862	3154
473.46431 Da 1121.80 s	18.7	474.472		C22H55N11	1545	1411	1350	1514	1314	1476	1375	1561	1577	1435	1358	1294	1472	1308	1408	1279	1472	1368	1529	1408	0	0	455	0	0	499	0	0	0	0	0	0	0	0	0	0	0	0	0	0
112.12352 Da 1133.15 s	18.89	113.131		C8H16	10705	0	172	9416	9516	10811	0	9623	239	9914	242	8384	8871	0	8902	9333	8606	8355	9662	8487	5468	5186	5319	5272	4667	5121	4863	4997	4935	4647	4720	4664	4494	4212	4011	4274	4261	3677	4349	4425
370.30939 Da 1136.68 s	18.94	371.317		C22H42O4	675	658	711	585	751	768	667	0	846	769	784	0	771	799	794	0	0	0	704	0	782	4454	846	833	3995	787	3831	3652	4602	4052	4078	3848	603	665	3729	3664	1163	3943	3564	3658
309.30419 Da 1145.65 s	19.09	310.311			0	0	0	0	0	0	0	0	0	0	0	0	0	0	0	0	0	0	0	0	0	4860	4952	0	4244	0	4350	4035	5091	4682	6890	6061	5102	4074	5014	4487	4850	4174	4486	0
283.28874 Da 1163.44 s	19.39	284.296		C18H37NO	0	0	0	0	0	0	0	0	0	0	0	0	0	0	0	1096	1098	936	0	0	0	9044	9925	8699	7360	0	7679	5776	5745	6772	5877	5496	0	4521	5633	5145	5201	3996	4961	4821
106.95862 Da 1164.00 s	19.4	107.966			0	96	0	129	152	93	0	97	0	141	0	0	205	0	251	296	151	270	203	0	1341	1207	1346	1359	1335	1408	1454	1463	1392	1405	1404	1436	1419	1299	1319	1431	1515	1570	1368	1389
172.06929 Da 1166.42 s	19.44	173.077		C7H12N2OS	605	601	0	685	784	645	954	698	0	698	0	676	744	0	1235	1168	1065	1054	918	965	7315	8287	8517	7757	7250	6510	6470	6150	6095	6937	6583	5053	4889	4986	5654	5355	4954	4627	4887	5119
440.29084 Da 1169.05 s	19.48	441.298		C24H36N6O2	0	0	0	0	0	0	0	0	0	0	0	0	0	0	0	0	0	0	0	0	0	19895	0	0	20425	0	20987	21318	21097	21259	22110	20384	0	0	20066	20841	0	20834	20257	0
274.15692 Da 1174.03 s	19.57	275.164		C13H18N6O	0	0	0	0	0	0	0	0	0	0	0	0	0	0	0	0	2317	2774	0	0	0	0	1602	1460	1525	0	1453	1493	1377	1384	1568	0	0	1379	1574	1518	1692	1422	1371	1445
129.15023 Da 1178.17 s	19.64	130.157		C8H19N	1555	1516	0	1650	1476	1618	1765	1937	0	1798	128	1638	1833	182	2253	2154	2002	1966	2063	1756	0	12647	12435	12689	0	12365	12351	12219	10782	12751	12463	11612	11565	0	11854	11553	11544	11783	11822	11486
121.08660 Da 1187.25 s	19.79	122.094		C8H11N	857	877	0	1050	879	969	931	1118	0	1168	0	1211	1156	0	1164	1146	1127	1167	1238	938	1271	1410	1249	1306	1361	1520	1277	1219	1296	1424	1354	1262	1320	1478	1342	1288	1515	1269	1323	1285
101.11857 Da 1190.40 s	19.84	102.126		C6H15N	2200	1990	142	1635	2018	1682	1605	1674	0	1649	0	1528	1498	128	1558	1296	1293	1298	1335	1501	2458	2439	2627	2576	2531	2473	2231	2225	2591	2677	2813	2475	2608	2365	2591	2251	2277	2595	2794	2606
215.91498 Da 1192.77 s	19.88	216.922			0	0	0	0	105	0	0	0	0	0	0	157	136	0	117	183	225	0	117	0	4059	4714	3952	3929	4129	4680	4354	3894	4471	4837	4224	4311	4301	4363	4703	4342	4399	4464	4688	4387
157.95515 Da 1193.19 s	19.89	158.962			0	0	0	0	0	0	0	0	0	0	0	0	0	0	0	0	0	0	0	0	1826	1638	1605	1640	1566	1713	1653	1736	1766	1591	1608	1489	1354	1598	1697	1857	1714	1735	1954	1874
89.96965 Da 1195.08 s	19.92	90.9769			156	191	0	0	313	0	393	0	0	326	0	417	360	426	0	0	428	402	0	491	4871	4751	4737	4651	4987	5420	4894	5017	5542	5196	4931	4892	4672	4924	5079	5393	5290	4888	5521	4948
225.94422 Da 1195.15 s	19.92	226.951			0	0	0	0	0	0	0	0	0	0	0	0	0	0	0	0	0	0	0	0	2817	2961	3111	3140	3201	3350	3016	3137	2939	3398	3039	3199	3189	3273	3210	3330	3298	2948	3580	3522
475.48117 Da 1195.82 s	19.93	476.488		C22H57N11	1723	1710	1710	1657	1519	1873	1598	1685	1757	1476	1778	1524	1580	1499	1644	1490	1542	1587	1398	1568	0	0	0	0	0	0	0	0	0	0	0	0	0	221	0	0	0	0	0	0
79.94822 Da 1200.15 s	20	80.9555			5902	5906	6321	6715	7422	6386	6825	7068	6723	6724	7251	7096	7362	7425	7261	7398	0	7436	7120	7638	6088	5931	6086	6092	5697	5662	5733	5876	5782	0	7105	7277	5108	0	5883	0	5808	6582	5794	6116
67.98650 Da 59.75 s	1	90.9771			19915	29286	0	24624	33863	23517	29645	34555	0	37711	0	48683	26053	39667	20785	15290	25799	24820	44700	38539	41826	42677	26697	41733	27155	16818	44454	30958	24770	24301	56011	14592	29666	25876	49225	53158	27026	25861	31607	52140
73.93061 Da 60.99 s	1.02	112.893			17992	10953	0	18144	13027	15193	0	17053	0	11132	0	13210	17612	0	16956	20393	14751	17711	18175	18456	8960	12672	11184	13986	12306	1585	12506	14161	12951	14957	13644	18330	12146	13092	12059	9324	13516	5994	9243	11545
141.93841 Da 61.70 s	1.03	164.927			6504	10177	175	10042	6375	9164	11496	7657	0	8154	0	12893	9332	0	6938	8867	10278	9669	8330	6997	12831	11073	18626	12652	13163	2556	13357	11987	10059	10070	14197	8402	15174	11403	11504	13469	13356	13967	14792	11925
79.94289 Da 61.99 s	1.03	80.9502			7256	12208	0	11827	7923	8833	0	8287	0	8632	0	12833	9102	0	7260	10217	9746	8990	8535	5753	7164	8578	14923	8189	9371	5360	10992	9551	6225	7165	9528	5573	11539	6507	6699	8019	9677	8611	9465	7784
195.86837 Da 61.79 s	1.03	196.876			1372	1362	0	1337	1015	1385	1570	1755	0	1265	0	1606	1953	0	1607	1924	1340	1837	1799	2220	1961	2275	0	2478	2274	707	1893	2174	2824	2864	2412	3783	1850	2514	2105	1622	2566	1341	1711	2243
202.05016 Da 62.15 s	1.04	203.057		C7H11N2O3P	4827	3966	249	3260	6016	5396	4157	3331	0	5450	243	3121	3173	251	5325	6783	3721	3745	4009	6340	12315	19636	0	17448	19726	1735	12133	13379	14063	14749	10653	12102	12962	0	12986	8187	0	10577	10938	11559
80.02609 Da 60.63 s	1.01	81.0334		C5H4O	38069	41984	45046	42868	36268	40281	0	37758	0	35861	40776	46578	40660	0	37496	38609	41583	40568	39934	30760	64882	63080	69324	63300	61221	54842	67959	62830	53099	65322	69533	51694	63059	52040	53321	53102	57461	60016	63740	51065
176.99990 Da 61.98 s	1.03	178.007		C4H7N3OS2	2615	2738	0	2291	2613	3328	3071	2453	0	2550	0	2985	2142	0	2355	2624	3118	2045	3399	2815	1866	2325	1835	1936	1944	440	1147	1115	1499	1160	1362	1422	1159	1624	1269	1097	1122	584	1197	795
174.10925 Da 61.72 s	1.03	175.117		C6H14N4O2	14298	9588	0	7041	15750	7679	8751	6558	0	7589	263	6556	7199	206	8628	10232	7524	6515	8556	7929	14882	17736	14868	11818	14606	0	10736	18273	10091	16136	13154	21399	18144	10604	11670	11581	15326	17580	10997	17094
196.09432 Da 60.54 s	1.01	197.102		C8H12N4O2	2454	2362	0	1759	2998	1291	1770	1104	0	1791	0	1178	1320	0	1402	1222	1234	1105	0	1079	1860	1979	1935	1426	1791	427	1251	2102	992	1728	1456	1840	1946	886	1266	1435	1713	1875	1521	1738
218.02023 Da 60.72 s	1.01	219.028		C5H15O3PS2	0	0	0	0	0	0	0	3918	258	0	0	3825	4341	0	7015	10373	4365	4733	5456	9455	16005	23422	16441	21419	22758	380	12615	15541	20126	21551	13429	20882	15011	16529	17643	9751	14126	11437	11789	15494
157.91094 Da 62.57 s	1.04	158.918			2180	1817	0	2416	2025	2521	2461	2836	153	2305	0	2559	3288	0	2822	3205	2648	3187	3312	3724	4565	4205	2832	4641	4181	1779	3509	3880	4661	4441	4133	5946	3550	4433	4306	3682	4067	2819	3766	3980
227.03110 Da 60.72 s	1.01	228.038		C7H9N5S2	0	0	0	0	0	934	0	1396	0	0	0	723	1356	0	1511	1061	862	1273	957	1489	1658	2192	1768	1921	1990	644	1090	1130	1511	1528	1024	1243	1003	1555	1450	1234	1066	1966	1516	1571
147.04802 Da 63.60 s	1.06	148.057	L-Glutamic acid	C5H9NO4	37035	28508	0	31207	35022	37751	33319	47283	0	35018	0	38803	59221	0	51599	53105	50163	60676	68660	75175	24481	31346	16720	24160	26186	8518	21544	26625	31439	37620	25370	35844	16152	28113	28077	12609	14416	5823	11857	15790
169.03316 Da 63.67 s	1.06	192.025		C7H7NO4	6663	6331	0	6733	6239	7570	7569	9411	0	6743	0	8608	11291	0	9278	9365	9141	11270	11817	10948	0	6146	0	4840	5844	1110	4544	5681	4986	6209	5340	5196	3985	0	5075	2604	0	1286	2635	3035
146.99296 Da 62.07 s	1.03	147.999			5851	4276	0	5334	4877	2794	2720	2620	0	2582	0	1803	1853	0	1951	1586	1671	1632	2017	2370	3186	4691	3576	3149	3554	0	2409	3268	3616	3526	1819	2365	2196	2364	2256	1127	1208	1975	1612	1567
205.04944 Da 62.28 s	1.04	206.057		C7H12NO4P	14695	13831	0	17346	14497	7499	8566	10493	0	12237	0	7550	9595	0	10895	8837	5981	8200	6639	11259	11112	17286	11554	13141	14288	5024	6955	7655	11780	11028	6321	10059	7197	10019	9219	5553	7535	11482	8834	12268
123.92677 Da 61.87 s	1.03	124.934			749	1063	2457	1061	702	835	1258	866	2541	971	2219	1311	1051	1954	867	846	1142	1050	942	900	1432	1429	1728	1581	1198	298	1623	1700	1221	1194	1548	1132	1439	1231	1109	1739	1468	1376	1904	1383
155.01597 Da 63.36 s	1.06	156.023			2615	2442	0	2322	2577	3280	2816	2105	0	2391	0	2826	1944	0	2137	2308	2536	2279	2893	2910	1549	1951	1650	1789	1499	230	1057	1236	1617	1198	1277	1419	855	1393	1159	926	1066	718	1327	1285
119.95241 Da 64.17 s	1.07	120.96			4563	5776	0	5567	4925	5606	6556	4978	0	5040	0	6903	5934	0	5027	5826	0	6035	5245	5618	7325	0	8414	7561	0	1461	0	0	0	0	0	0	8402	7546	5797	0	7401	0	8781	7694
117.07594 Da 66.36 s	1.11	118.083		C5H11NO2	31282	23184	134	27505	23326	33159	0	28490	186	24676	0	28938	31232	0	29135	26538	26270	25760	35929	42329	25858	28937	26787	20060	24372	13823	19048	20749	19893	22916	8724	21061	16426	15588	18222	11700	12770	10396	10052	13438
113.05575 Da 65.00 s	1.08	114.063		C4H7N3O	2396	1936	0	1961	1990	1952	1284	2107	162	1843	0	2413	2432	0	2210	2621	2134	2258	2413	2264	4572	4763	3771	3181	4509	2762	2308	4365	3513	4127	4771	6467	3775	3888	3356	2593	3068	2657	1847	3181
183.06563 Da 64.19 s	1.07	184.073	Phosphocholine	C5H14NO4P	56459	55141	0	50746	70945	34824	35346	41852	0	57815	0	25101	34925	0	46598	28435	24547	29306	32058	51462	25583	33767	25036	29341	31300	20433	16542	19106	29128	27366	17996	25414	15133	23300	24991	14917	17763	26912	22511	32499
125.00758 Da 66.84 s	1.11	126.015		C4H3N3S	8070	5528	0	6735	5837	3443	3540	3243	0	3024	0	2275	2284	0	2149	2002	1885	1767	2226	2803	4239	0	4888	4361	0	0	0	0	0	0	0	0	2629	3219	0	1094	1924	0	1835	2294
131.06718 Da 66.28 s	1.1	132.074		C4H9N3O2	0	0	0	34937	31685	35370	0	34999	0	31880	0	38007	40414	0	33213	38888	36213	37248	47591	51085	164902	208038	177505	130292	177177	0	125331	172387	150403	182248	151199	209321	135695	128246	136878	83304	123023	92846	90613	120377
158.05243 Da 70.91 s	1.18	159.06		C9H6N2O	31007	25239	325	20937	15971	16152	23927	17462	182	24906	643	22175	14404	190	20972	11968	19369	14016	18277	18211	765	605	893	843	770	2025	697	531	602	852	790	963	604	589	527	798	1096	703	710	711
136.06871 Da 73.17 s	1.22	137.076		C4H12N2OS	31844	0	3250	3743	18773	19529	0	19591	2794	25114	14191	22206	16462	2898	22313	13061	18724	15029	23017	23687	911	459	800	630	651	414	620	475	631	718	760	775	675	618	692	1009	788	693	566	744
177.98400 Da 76.74 s	1.28	178.991		C8H3O3P	1454	1657	0	1659	1344	1773	2755	3268	0	1975	0	2960	3491	0	2790	2998	3103	3789	2346	1777	3531	5706	5757	3244	4670	2453	3490	3177	3599	4174	3566	3626	2642	2517	2715	2147	2463	1144	1633	1937
155.99978 Da 76.80 s	1.28	157.007			3534	4599	0	4192	2960	4428	5951	8320	0	4147	0	7166	10836	0	8873	7036	7492	10465	7680	5236	8727	14790	12943	6662	12800	3966	6934	6893	8113	11431	8084	10994	5702	5977	7440	3815	5592	2897	3140	4860
190.04196 Da 78.75 s	1.31	191.049		C7H11O4P	7003	4676	0	3869	4793	808	2839	3437	206	4408	250	520	0	258	1151	0	0	0	0	949	0	5170	0	4737	5772	0	3501	6659	6967	7503	7006	10935	4914	0	5138	3814	0	2961	3791	5570
135.05077 Da 78.23 s	1.3	136.058		C5H5N5	3814	4891	0	4636	4291	5234	4108	5644	0	4014	0	3975	5330	0	4883	3868	0	4211	3742	5520	12617	13745	17160	10342	17183	0	8576	11073	18998	14612	16703	14945	10923	18376	11673	10677	12025	0	12108	13649
122.04571 Da 80.19 s	1.34	123.053	Niacinamide	C6H6N2O	1139	0	0	6991	5429	8762	0	8512	0	6620	0	8748	9697	0	8963	15754	10289	11281	11911	11762	22748	24155	23452	16075	18808	21069	21816	30584	24859	25056	46173	62360	46082	45041	45077	37769	51470	37071	40486	49193
117.07646 Da 78.79 s	1.31	118.084		C5H11NO2	28510	18299	0	18516	20359	22952	0	29989	220	19956	0	29695	34922	0	27242	46630	35522	37577	36678	33339	62756	77398	45567	62399	52397	18262	67152	63908	62018	7883	76018	95250	68521	59702	7190	67715	72661	12792	5575	68679
136.03169 Da 79.57 s	1.33	137.039		C4H9O3P	2058	3094	0	1983	6196	6341	17878	32274	0	19036	0	25585	54020	0	51378	31662	0	64264	11083	73660	67705	0	149592	102391	0	18517	0	0	0	88186	68152	0	97651	159928	90174	63110	98705	443	152237	133233
144.03011 Da 78.94 s	1.32	145.037			1351	1015	0	1053	871	1307	1115	921	0	911	0	1009	868	0	1144	439	794	892	841	1029	0	1125	1312	1163	1362	765	1153	1450	1513	1615	1502	1363	1582	1418	1363	1513	1060	1424	1490	1664
80.02566 Da 79.09 s	1.32	81.0329		C5H4O	4190	4304	5064	4904	3783	4686	0	4214	0	3686	0	5485	5163	0	4286	4609	4070	5073	6078	4663	8810	7221	9281	7248	8123	7363	6754	8294	7921	8669	10348	8181	8709	0	8352	8458	8813	7817	9191	8181
99.06465 Da 81.56 s	1.36	100.072		C5H9NO	2696	2444	0	2596	2417	2688	2429	2390	0	2493	0	2204	2432	0	2385	2312	2558	2583	2498	2777	0	523	198	280	425	1458	434	260	0	0	463	212	0	0	476	528	0	186	203	0
158.01723 Da 82.30 s	1.37	159.025		C7H2N4O	0	148	622	0	0	0	925	1620	693	1098	518	1554	2797	0	2179	1382	2639	3128	823	3332	5293	8732	9063	8736	6017	823	3662	7833	7886	4472	3734	0	11687	10673	4883	4499	5679	9056	10454	8467
204.02967 Da 84.98 s	1.42	205.037		C6H9N2O4P	499	438	0	402	527	0	0	469	0	477	0	0	0	0	405	0	381	491	0	515	2824	4334	3216	2688	3901	2024	3587	4316	3480	4340	3444	4537	4519	2585	3668	3331	4113	3772	2175	3641
191.99443 Da 85.90 s	1.43	193.002		C6H8O3S2	0	0	0	0	0	0	0	0	0	0	0	0	0	0	0	0	0	0	0	0	1914	2186	1652	1537	1879	1271	1999	2125	1830	2374	1940	2328	2167	1635	1999	1645	2259	2032	1371	2124
173.98365 Da 85.80 s	1.43	174.991		C4H3N2O4P	0	0	0	0	0	0	0	0	0	0	0	0	0	0	0	0	0	0	0	0	2933	3596	3149	0	3201	1935	3072	3504	2637	2967	2638	2705	3333	0	3261	2887	3031	3178	0	3223
80.02489 Da 94.58 s	1.58	81.0322		C5H4O	2499	2046	2259	2176	2213	2001	2462	1979	2299	1960	1888	2237	2249	2099	1911	2039	1809	2052	1975	1987	8729	8530	8796	8462	8612	8417	8199	5609	8095	8116	10057	8124	8270	7148	7466	8149	8464	7801	8374	8332
194.11588 Da 309.84 s	5.16	217.106		C8H18O5	0	0	0	0	0	0	0	2779	0	1997	0	2054	1817	0	2261	2039	2123	1812	2052	2599	14382	22078	15273	14798	13642	19800	13622	12320	11091	17816	16010	13918	32478	12089	16183	14587	14756	11014	13618	15122
238.14257 Da 339.46 s	5.66	239.15		C10H22O6	0	0	0	0	0	0	0	0	0	0	0	0	0	0	0	4202	4327	5099	0	0	6069	7700	6437	5313	5042	11039	4478	4478	4917	5660	7093	3087	13604	4031	5709	5002	4393	4571	4959	5577
134.09250 Da 341.43 s	5.69	157.082		C6H14O3	475	514	0	492	418	435	513	428	0	469	0	503	520	0	509	490	499	470	481	541	7634	5357	6753	3534	7239	4857	47276	3598	3599	3582	8133	4414	4336	4535	6814	10188	6203	3561	10281	5261
282.16967 Da 360.60 s	6.01	305.159		C12H26O7	0	0	0	0	0	0	0	0	0	0	0	0	0	0	0	0	0	0	0	0	0	6427	6176	5396	5096	345	4450	4500	4564	5041	6131	2736	0	3571	4773	3682	4151	5595	4645	5204
192.13742 Da 396.24 s	6.6	193.145		C10H16N4	5171	4995	1732	5146	4806	5009	5168	4986	0	5269	0	4919	4946	0	5234	5300	4806	4876	4491	4643	409	537	531	450	326	781	1625	450	358	458	508	397	394	407	398	454	364	389	480	405
214.11872 Da 399.44 s	6.66	215.126		C7H14N6O2	1900	1988	0	2295	2168	0	2075	3354	0	2134	0	3327	3693	0	3514	3453	3623	3686	3406	3454	2190	2477	2639	2295	2056	2647	7622	1699	1979	2127	2049	2124	1847	2058	2089	2386	2190	2071	2218	2011
187.11958 Da 425.42 s	7.09	170.116		C9H17NO3	1402	1437	0	1273	1158	922	1135	685	0	842	0	759	776	0	986	1008	1336	794	843	732	8946	8824	8724	8779	9279	9093	8282	7842	8693	7901	8672	8182	7291	7203	7398	7898	7748	7008	7251	7573
171.12526 Da 446.54 s	7.44	194.115		C9H17NO2	1430	1630	0	1477	1437	1416	1533	1410	0	1414	0	1447	1413	0	1580	1438	1323	1645	1489	1552	27709	28173	27874	29087	28490	27463	28818	29856	30419	31627	29342	31178	30762	30986	32392	33282	33315	33296	31885	33886
172.10964 Da 446.77 s	7.45	155.105		C9H16O3	593	603	1196	524	665	682	743	557	229	577	216	564	635	302	691	617	705	549	526	498	13353	13423	13023	13385	13316	11770	12272	11932	10298	11891	12593	12116	11372	10982	11241	10521	11113	10221	11643	11227
211.11801 Da 446.21 s	7.44	212.125		C7H13N7O	0	0	0	0	0	0	0	0	0	0	0	0	0	0	134	0	0	0	0	0	4027	3779	3809	4001	4245	3304	3968	4103	4570	4255	4021	4550	4408	4941	4593	4642	4772	4717	4395	4513
272.16102 Da 469.00 s	7.82	273.168		C10H20N6O3	0	0	0	0	0	0	0	0	0	0	0	0	0	0	0	0	0	0	0	1122	0	3675	3386	3305	3266	0	4889	3177	2864	3449	3105	2971	0	3003	3147	3120	3516	2949	3284	3423
250.17770 Da 469.01 s	7.82	251.185		C12H26O5	0	0	315	0	0	0	0	0	283	0	229	0	0	251	0	0	2522	0	0	0	1142	1060	1240	1126	1096	0	1401	891	993	1036	1077	1121	0	1606	894	0	1082	1098	943	1106
148.02942 Da 487.22 s	8.12	149.037			1162	1285	0	1202	1214	1161	1175	1145	804	576	234	564	524	537	529	624	571	312	439	417	0	1786	1742	1593	1454	1675	1775	1292	1499	1729	1180	1394	1824	1745	1546	1444	1603	1598	1471	1679
166.04016 Da 488.09 s	8.13	167.047			1124	768	0	605	642	602	568	574	0	717	0	338	326	0	366	510	354	374	512	361	1160	1379	1448	1115	1092	1047	1156	1305	1123	1357	1260	1191	1578	1185	1285	1271	1282	1081	1277	1117
162.12376 Da 495.91 s	8.27	163.13		C7H18N2S	21619	22921	0	20772	21875	21546	21172	21365	0	20639	0	20421	20298	0	21132	20709	20510	20645	21664	20693	5202	4711	4673	4999	4621	4041	24105	4540	4548	4236	5434	4572	3998	3906	4391	4231	4103	3800	4257	4102
88.05355 Da 495.43 s	8.26	89.0608		C4H8O2	2847	2858	0	2895	2841	3065	2772	2897	0	2991	0	2858	2899	1817	2895	2745	2703	3348	2878	3034	1015	734	1144	864	739	1293	3915	837	802	652	855	874	848	799	875	876	787	814	775	740
106.06036 Da 495.80 s	8.26	107.068		C4H10O3	5200	5725	410	0	5368	0	5117	5472	516	0	460	5657	0	450	5099	5181	4926	5150	5110	5058	1427	1358	1513	1404	1487	1510	5665	1546	1335	1432	1837	1506	1206	1233	1335	1327	1202	1372	1256	1383
170.09230 Da 498.53 s	8.31	171.1		C5H10N6O	1126	909	200	924	962	864	834	846	0	879	0	870	905	0	952	752	1103	846	777	836	1431	1434	1297	1325	1159	2004	1269	1127	1238	1095	1226	1203	1185	1305	1377	1124	1248	1038	1104	1159
210.08784 Da 501.48 s	8.36	211.095		C7H10N6O2	0	0	0	0	260	0	299	5159	0	249	0	4729	4907	0	4839	4784	4782	4796	5028	4984	1808	1758	1907	2186	1942	3093	1556	1732	1668	1951	1892	1956	1583	1720	1778	1794	1700	1606	1687	1654
192.07987 Da 504.61 s	8.41	193.087		C11H12O3	4020	4224	0	3869	3839	3919	3634	3834	0	3907	0	3938	3940	0	3769	3798	3788	3876	3762	3655	0	0	0	0	0	0	0	0	0	0	0	0	0	0	0	0	0	0	0	0
128.11906 Da 512.25 s	8.54	129.126		C8H16O	725	885	200	752	796	872	666	878	178	877	143	826	775	178	873	799	774	844	840	863	1692	1765	1667	1776	1796	1754	1643	1873	1597	1878	1721	1609	1552	1618	1719	1668	1797	1831	1699	1676
176.10260 Da 513.64 s	8.56	177.11		C8H16O4	2931	3296	0	3369	3044	2913	2885	2889	0	3098	0	3324	2955	0	3050	2915	2939	3110	3037	3253	0	0	0	0	0	0	389	0	0	0	369	0	0	0	0	0	0	0	0	0
206.15225 Da 519.00 s	8.65	229.142		C10H22O4	0	0	0	0	0	0	0	0	0	0	0	0	0	0	0	2680	2396	2000	0	2030	58679	132437	26555	111062	48299	73636	37062	40614	15583	35525	9313	101064	68381	53786	73096	13473	43611	42010	101993	95819
150.08718 Da 519.12 s	8.65	151.094		C6H14O4	932	1058	0	950	707	993	1018	976	0	661	0	902	810	0	758	774	845	871	867	696	4031	9295	1763	7711	3095	4922	2535	2554	1037	2528	881	6418	4522	3436	4645	941	2614	2518	6635	5367
182.06975 Da 521.21 s	8.69	183.077	Triethyl phosphate	C6H15O4P	15329	15181	0	14957	14010	13911	14612	14423	0	14978	0	13929	14964	0	14334	13848	14288	14592	13814	14914	555	0	533	577	564	0	527	504	0	586	480	492	499	424	440	487	646	441	534	436
88.05284 Da 519.24 s	8.65	89.0601		C4H8O2	720	656	0	708	625	655	645	808	0	695	812	704	662	620	749	642	681	672	669	668	2254	5017	1341	3751	2037	2844	1542	1722	751	1311	458	3299	2337	1933	2450	728	1642	1636	3306	2940
197.14073 Da 526.13 s	8.77	198.148		C11H19NO2	581	544	0	419	521	701	626	450	0	552	0	339	406	0	435	407	422	353	397	709	1404	1288	1249	1767	1355	1418	1623	1139	1241	1228	1672	1419	995	858	1143	1182	1299	969	1155	1139
232.07141 Da 533.13 s	8.89	233.079		C7H13N4O3P	0	0	0	0	0	0	0	0	0	0	0	0	0	0	0	0	0	0	0	0	1082	1288	1041	1104	963	1151	1254	1109	1163	1031	1074	1105	1081	1003	1060	948	1262	1099	1135	1106
219.12331 Da 537.48 s	8.96	220.131		C9H13N7	0	0	0	0	0	0	0	0	0	0	0	180	171	0	0	0	195	136	145	116	1072	1063	1269	1006	0	1150	1070	1019	1252	1262	1092	1051	1044	1107	1326	1134	1466	1086	1342	1391
166.09505 Da 538.46 s	8.97	167.102		C6H10N6	2855	2532	401	3059	2669	2602	2648	2632	307	2682	362	2458	2733	435	2677	2559	2804	2344	2578	2501	461	419	600	406	505	612	468	389	0	376	419	457	381	407	454	405	370	461	380	399
194.09146 Da 540.77 s	9.01	195.099		C7H10N6O	0	0	0	0	0	0	0	0	0	0	0	0	1023	0	1042	0	0	0	0	0	2361	1880	2115	2026	1898	3070	1892	1942	2184	1910	1986	2012	2225	2066	2065	2079	2200	1974	1938	1970
212.10334 Da 546.02 s	9.1	213.111		C7H12N6O2	0	0	0	491	612	0	0	494	0	0	0	1484	502	0	1607	1401	1410	1533	0	1629	2179	2075	1800	2079	2018	2269	2047	2016	2025	1947	2217	1958	2049	1770	1913	1926	1947	1820	1792	2099
213.10032 Da 566.25 s	9.44	214.107		C11H11N5	0	0	0	0	0	0	0	0	0	0	0	0	0	0	0	0	0	0	0	0	2096	2092	2103	2136	2065	2040	2105	2005	2164	2027	2056	2131	2008	1939	1897	2043	2101	1773	1922	1903
199.15675 Da 570.34 s	9.51	222.146		C11H21NO2	1248	1321	1425	1320	1336	1333	1371	0	1246	1328	1294	0	0	1336	0	0	0	0	0	0	1194	1134	1245	1255	1235	1184	1181	1316	1425	1443	1348	1369	1295	1217	1482	1367	1477	1310	1520	1526
229.16811 Da 571.69 s	9.53	212.164		C12H23NO3	720	811	0	665	683	0	670	745	0	737	0	582	599	0	622	652	847	645	816	1113	2192	2068	2100	2385	2374	2569	2432	1746	2454	2173	2458	2401	1966	1868	1836	1916	2309	1888	2334	2008
215.18823 Da 584.95 s	9.75	216.196		C8H21N7	646	485	0	549	465	925	485	370	0	585	0	521	653	0	503	448	506	558	518	1007	1538	1673	1330	1336	1412	1731	1474	1305	1445	1348	2398	1490	1269	1315	1461	1392	1191	1191	1247	1362
237.17090 Da 584.97 s	9.75	238.178		C10H19N7	205	154	0	136	0	124	0	0	130	0	0	0	0	0	0	0	0	0	0	0	987	1032	1084	1070	1038	1367	1243	1092	1285	1311	1508	1047	1355	1332	1383	1727	1519	957	1219	1195
211.15706 Da 590.85 s	9.85	234.147		C12H21NO2	0	0	0	0	0	0	0	0	116	0	0	0	92	0	0	0	0	0	0	0	3183	2774	2825	3181	2979	2605	2719	3179	3122	2914	3010	2976	2880	3163	3410	2996	3092	3016	3232	3257
234.12370 Da 598.28 s	9.97	235.131		C10H14N6O	0	0	0	0	0	0	0	462	184	0	0	564	536	0	515	519	496	501	582	601	1519	0	1412	1470	1420	1418	1558	1362	1482	1538	1453	1413	1340	1301	1311	1527	1472	1501	1525	1473
226.15705 Da 611.13 s	10.19	227.165	4,5-Dihydrovomifoliol	C13H22O3	0	0	0	0	0	0	0	0	0	0	0	0	0	0	4208	5018	4293	4934	0	4958	1944	2300	2429	1971	2332	2048	1978	1852	2047	2093	2026	1817	2000	1822	1942	1898	2000	2000	2121	1804
243.18430 Da 614.98 s	10.25	226.181		C13H25NO3	0	0	0	0	0	0	0	0	0	0	0	0	0	0	2966	2792	3523	3216	0	6585	13958	12629	12824	13953	13410	16417	11488	12388	11471	12701	13416	11387	11126	10648	12152	11657	11295	11010	11670	11385
212.13854 Da 622.30 s	10.37	213.146		C8H16N6O	915	662	0	0	0	0	976	1273	0	1277	0	1217	1164	0	1103	1193	1239	1112	1369	1310	2888	2607	2884	2716	2686	2828	3049	2779	2970	2987	3038	3037	2514	2882	2851	2770	2861	2568	2858	2795
213.17273 Da 624.46 s	10.41	236.163		C12H23NO2	0	0	326	0	0	0	0	0	350	0	324	0	0	280	0	0	0	0	0	0	1354	1238	1273	1379	1588	1457	1219	1321	1409	1401	1451	1385	1382	1402	1469	1569	1541	1345	1384	1497
148.04406 Da 659.02 s	10.98	149.051			1120	1209	3314	1096	1275	1409	1297	1318	2660	1170	2597	1439	1310	2576	1207	0	0	1370	1203	1220	0	843	0	873	908	864	774	805	703	841	750	827	764	0	930	841	810	862	0	785
166.05889 Da 660.87 s	11.01	167.066		C5H6N6O	3302	3220	190	3447	3462	3841	3523	3106	0	3011	0	3352	3098	0	3461	3682	3483	3932	3399	3636	0	628	0	0	578	0	555	672	643	660	671	741	0	0	657	661	0	0	0	0
236.13984 Da 666.59 s	11.11	237.147		C10H16N6O	237	778	704	833	0	735	232	0	719	300	642	0	0	542	2062	2420	2315	2050	0	0	1925	1894	2005	2119	2049	2094	1978	2062	2379	2224	2645	1891	1941	1923	2108	2105	2157	2155	2170	2220
194.16611 Da 666.12 s	11.1	195.173		C13H22O	504	509	725	402	0	415	574	458	638	486	716	474	471	604	526	581	626	440	460	463	3401	3389	3363	3540	3131	3421	3061	2932	3252	3088	3818	3068	2743	2798	2715	2967	2752	2593	3070	2660
234.16000 Da 666.14 s	11.1	235.167		C11H18N6	421	377	416	385	390	436	348	0	336	371	593	0	0	478	0	0	0	0	0	0	5532	5679	6205	5831	6438	6270	6206	6379	6311	6154	6546	6098	6416	6248	6332	6910	6567	6151	6561	6637
176.15502 Da 666.24 s	11.1	177.162		C13H20	411	354	0	373	454	372	428	510	0	464	0	365	550	0	459	447	495	438	455	434	3669	3695	3810	3309	3065	3257	3202	2990	2935	3392	3011	2771	2522	2409	2821	2798	2554	2461	2456	2880
196.14851 Da 666.88 s	11.11	197.156		C9H24O2S	5047	4749	0	4648	5046	4925	4383	4503	0	5193	0	4684	4752	0	5233	5239	4855	4837	5567	4779	618	606	640	594	558	574	575	536	590	617	528	445	545	584	549	621	532	546	505	460
227.18923 Da 674.86 s	11.25	250.178		C13H25NO2	0	0	0	0	0	0	0	166	0	0	0	155	0	0	171	126	129	185	0	166	6043	5897	5892	6242	6259	0	6139	6591	6676	6738	6229	6386	6470	6961	6731	6947	6813	7119	6723	7360
262.04957 Da 680.85 s	11.35	263.057		C14H6N4O2	0	0	0	0	0	0	0	250	0	0	0	192	0	0	204	200	183	170	192	0	0	2610	2457	0	2317	0	2080	2368	2813	2878	2229	2128	0	2582	2905	2507	2820	2355	2513	2194
222.05765 Da 680.96 s	11.35	223.065		C12H6N4O	0	0	0	0	0	0	0	7211	0	0	0	5530	4781	0	4991	4621	4409	4544	4081	4097	3777	4252	3777	3370	3378	4377	3110	3559	2965	3465	2888	2675	3123	2739	2903	2559	2493	2185	2450	2332
157.14382 Da 683.35 s	11.39	158.151		C9H19NO	9942	9322	0	9896	10230	10848	9874	10809	0	10694	0	10255	10494	0	10112	10361	10463	10682	11332	10534	7820	7839	7546	6654	7521	6879	7629	6832	6758	7045	7794	6712	6919	6311	6714	6179	6498	6326	6413	6431
179.12711 Da 683.41 s	11.39	180.134		C6H17N3O3	0	0	811	0	0	0	0	0	789	0	859	0	0	837	0	0	0	0	0	0	1708	1421	1422	1619	1547	1418	1510	1596	1632	1468	1564	1662	1596	1417	1385	1399	1508	1574	1624	1524
254.15293 Da 685.66 s	11.43	255.16		C14H22O4	0	0	0	0	0	0	0	0	0	0	0	0	0	0	0	0	13829	0	0	0	6710	6098	5917	5926	5633	0	5600	5755	5574	5695	5573	12293	0	23047	5431	25156	5160	4598	5192	5141
224.14213 Da 687.41 s	11.46	225.149		C13H20O3	0	0	0	0	0	0	0	51463	0	0	0	50801	0	0	52347	50387	50499	50467	0	51753	9741	10288	9912	9267	9788	9321	9049	9208	8420	9873	9686	9390	9023	8777	9290	9130	9495	8832	9565	9549
246.12456 Da 687.48 s	11.46	247.132		C11H14N6O	0	0	0	0	0	0	0	0	0	0	0	0	0	0	0	1567	1505	1372	0	0	4449	4184	4737	4352	5424	4470	4828	4388	4772	4820	4850	5030	4890	5273	5382	5193	5442	5470	5222	5382
294.18468 Da 697.78 s	11.63	295.192		C17H26O4	177	0	0	0	0	0	0	0	0	0	0	0	0	0	0	0	0	0	0	0	0	2169	2174	2206	2693	0	2027	1994	2071	2420	2029	2164	0	1985	2075	2112	2242	1819	2018	1984
236.14379 Da 698.64 s	11.64	237.151		C14H20O3	0	278	0	994	901	1035	0	1110	13996	967	13951	3833	0	13090	3857	3593	3360	3639	0	4052	969	1028	1085	528	1056	1029	1076	947	986	1048	967	957	871	1088	857	946	956	848	972	1152
292.16691 Da 710.95 s	11.85	293.174		C13H20N6O2	0	0	0	0	0	0	0	0	0	0	0	0	0	0	0	0	0	0	0	0	0	1276	1112	1139	1220	0	1109	1062	1268	1241	1133	1129	901	900	1171	1026	1190	1294	1110	1275
182.05511 Da 717.88 s	11.96	183.064	3,4-Dihydroxyhydrocinnamic acid	C9H10O4	12077	11678	0	12120	12547	13286	12335	12100	0	12604	0	12939	12012	0	13668	13412	13535	13610	13876	14281	386	301	247	307	233	319	0	378	0	320	0	0	0	272	0	0	271	258	0	318
294.18342 Da 723.15 s	12.05	295.191		C13H22N6O2	0	0	0	0	0	0	0	0	0	0	0	0	0	0	0	0	0	0	0	0	0	1773	1856	2128	2006	0	1714	1733	1733	1815	1761	1553	0	1572	1753	1989	1649	1507	1703	1725
316.16683 Da 725.18 s	12.09	317.174		C15H20N6O2	0	0	0	0	0	0	0	0	0	0	0	0	0	0	0	0	0	0	0	0	0	2200	0	2147	2187	0	1872	2236	1931	1815	2045	1954	0	2073	2058	2168	2202	1859	1892	1832
276.17213 Da 728.81 s	12.15	277.179		C13H20N6O	0	407	0	0	0	0	0	0	0	0	0	0	0	0	0	0	0	0	0	0	1722	2147	2092	1943	1866	0	1670	1732	1666	1841	1823	1687	0	1716	1667	1687	1897	1577	1615	1869
310.18005 Da 731.82 s	12.2	311.187		C17H26O5	0	0	0	0	0	0	0	0	0	0	0	0	0	0	0	0	0	0	0	0	0	5577	0	5759	5036	0	4834	4921	5282	5262	4911	4888	0	4696	4582	4660	4946	4913	4673	4774
254.18820 Da 731.77 s	12.2	255.195		C15H26O3	0	664	0	0	1089	1045	604	0	0	0	0	0	624	588	509	0	0	0	0	0	1302	1412	1194	1292	1293	0	1309	1322	1063	1330	1240	1313	0	1002	1155	1241	1163	1071	1140	1205
171.15998 Da 734.88 s	12.25	172.167		C10H21NO	7704	3759	0	5040	3341	6211	6923	4972	0	3318	0	7553	6621	0	4453	5405	6582	5026	7134	4820	6077	6047	5682	6638	5958	6056	6415	5316	5707	5456	5655	5999	4828	5320	5753	5786	5423	5119	5907	5010
193.14245 Da 734.94 s	12.25	194.15		C7H19N3O3	0	0	1453	0	0	0	0	0	1473	0	1650	0	0	1440	0	0	0	0	0	0	1120	984	1096	1065	1174	1236	1215	1217	1080	1023	1037	1175	971	1109	1004	1275	1099	1100	1169	1358
258.16062 Da 757.82 s	12.63	259.168		C13H18N6	0	0	0	0	0	0	0	0	0	0	0	0	0	0	0	388	291	313	0	233	1304	1133	1209	1366	1220	0	1664	1260	1154	1362	1309	1285	0	1187	1332	1237	1172	1180	1331	1203
196.14850 Da 760.21 s	12.67	197.156		C12H20O2	9472	8862	0	9740	9641	8939	9837	9343	0	8902	0	8912	9110	0	9392	9245	8994	8816	9158	9176	485	428	510	511	522	449	504	510	415	507	417	448	468	480	384	523	403	464	245	391
104.02748 Da 761.21 s	12.69	105.035			4636	4522	0	4888	5124	5282	4903	4906	0	5183	0	4844	5132	0	5486	5280	5566	5359	5762	5493	0	13127	0	0	13539	13477	13961	0	17187	18469	0	0	0	0	0	15804	0	15054	15743	0
316.16686 Da 762.84 s	12.71	317.174		C15H20N6O2	0	0	0	0	0	0	0	0	0	0	0	0	0	0	0	0	0	0	0	0	0	2361	0	2056	2215	0	2155	2137	1849	2258	2064	2072	0	1975	2264	1957	2187	2154	2133	2483
294.18482 Da 762.85 s	12.71	295.192		C17H26O4	0	0	374	0	0	0	0	0	0	0	0	0	0	0	0	0	0	0	0	0	0	8547	7559	8290	8511	0	7932	7980	7641	7536	7582	7748	0	7035	8004	7834	7642	7375	7864	7890
216.17293 Da 765.27 s	12.75	217.181		C12H24O3	0	0	290	0	0	0	0	1551	0	0	0	1714	1653	0	1657	1460	1558	1676	1688	1665	1742	1642	1779	1827	1559	1803	1652	1717	1518	1705	1628	1407	1471	1525	1809	1763	1872	1558	1608	1701
128.11800 Da 765.28 s	12.75	129.125		C8H16O	0	0	0	4641	5381	4669	0	4480	0	5550	0	4787	5429	0	5091	5175	5307	5312	5372	5606	5665	5563	5528	5238	5389	5883	5746	5260	5470	5722	5484	5425	4951	5266	5284	5403	5450	5576	6075	5478
248.10342 Da 766.54 s	12.78	249.111		C10H12N6O2	0	0	0	0	0	0	0	0	0	0	0	228	293	0	0	0	274	0	328	329	3951	3728	3785	3863	4154	4088	3941	3504	4239	4103	4083	3919	3763	3840	4259	4060	4373	4110	4368	4379
238.15486 Da 765.22 s	12.75	239.162		C10H18N6O	1820	1637	1638	1745	1658	1752	1816	0	1605	1758	392	0	0	1953	0	2399	2257	2468	0	0	24746	24677	25676	28368	27389	22471	25464	25607	24923	26009	26127	23942	23742	26945	26260	26318	27888	27597	28214	26516
226.12046 Da 766.52 s	12.78	227.128		C13H14N4	0	0	0	864	0	727	0	860	0	878	0	0	912	0	927	840	1041	1084	0	862	1437	1436	1214	1607	1508	1460	1274	1374	1137	1250	1264	1151	1033	1225	1253	1255	1253	1008	1090	1349
246.07239 Da 770.36 s	12.84	247.08		C14H14O2S	0	0	0	0	0	0	0	0	0	0	0	0	0	0	0	0	0	0	0	0	7194	7186	7019	6776	6946	7088	7118	6996	6771	6976	6864	5655	6406	6179	6385	6892	6526	5904	6161	6688
88.05372 Da 772.87 s	12.88	89.061		C4H8O2	4733	4819	0	4858	4916	4665	4657	4776	0	4903	0	4937	4617	0	4438	5038	4789	4923	5367	4854	1027	414	468	1035	523	426	489	551	515	388	455	326	442	523	440	464	1082	415	528	460
260.13878 Da 775.42 s	12.92	261.146		C12H16N6O	0	0	0	0	0	0	0	0	0	0	0	0	0	0	0	0	0	0	0	0	1919	1651	1853	1936	1872	0	1749	1948	1716	1882	1826	1812	0	1919	1972	1958	2002	1828	1997	1911
252.17312 Da 776.07 s	12.93	275.162		C15H24O3	0	0	0	0	0	0	0	0	0	0	0	0	0	0	0	472	266	411	0	0	0	3192	3067	3013	2843	0	2771	3000	2948	3028	3059	2962	0	3182	3124	2777	3246	3070	3487	2980
262.21552 Da 776.03 s	12.93	263.222		C14H30O4	0	0	197	0	0	0	0	0	0	0	0	0	0	169	0	0	177711	0	0	0	0	1499	1414	1379	1691	0	1372	1419	1208	1234	1686	1364	0	1338	1314	1342	1305	1393	1324	1513
236.17799 Da 777.66 s	12.96	219.174		C15H24O2	0	0	516	0	0	0	480	0	0	0	419	0	0	401	0	0	0	0	0	0	21810	22240	21457	20922	21145	21011	21551	21792	20712	20873	21658	20238	20060	19961	20451	20864	18322	19377	20412	21314
226.19388 Da 778.75 s	12.98	249.183		C14H26O2	0	0	0	0	0	0	0	332	0	0	0	0	371	0	479	289	0	291	354	352	3124	3019	3387	3165	3042	3407	3653	3251	3152	3308	3149	3285	3320	3037	3131	3021	3379	3479	3495	3024
238.15519 Da 781.11 s	13.02	239.162		C10H18N6O	0	358	0	0	745	0	793	0	0	393	0	0	0	0	0	1596	1543	1481	0	0	17980	18065	19648	20013	20028	17560	18697	18387	18986	19263	18262	18954	17136	19381	19195	18901	19249	20954	19153	18841
216.17345 Da 781.25 s	13.02	199.17		C12H24O3	6498	6395	614	6325	5795	6596	0	6307	560	6186	604	5928	6074	417	5838	6283	6293	6284	6260	6435	4879	4772	4721	4694	4249	4339	4298	4622	4646	4933	4594	4451	3953	4393	4683	4844	4508	4380	4838	4502
110.10804 Da 781.25 s	13.02	111.115		C8H14	10142	0	0	11209	10806	10296	0	10756	214	10460	129	10922	10306	0	10528	10290	11387	10392	11508	11783	8313	8168	8159	8369	8518	8851	7779	9537	7857	8040	8237	8041	7625	8466	8067	8632	8241	8290	7798	7793
236.13950 Da 788.78 s	13.15	237.147		C10H16N6O	387	409	398	445	397	258	445	604	347	397	342	697	633	311	604	673	611	650	630	670	1284	1151	1051	1112	1159	994	1112	1189	1060	1188	1117	1139	0	1239	1138	1093	1050	1118	1157	1218
236.17757 Da 800.32 s	13.34	237.185		C11H20N6	672	865	764	504	370	819	667	456	439	313	657	517	485	314	376	498	396	426	552	571	1096	1253	1185	1258	1216	1344	0	1175	1130	1202	1162	1059	1295	1205	1079	0	1178	1002	1200	1194
336.25179 Da 803.26 s	13.39	359.242		C17H36O6	0	0	0	0	0	0	0	0	0	0	0	0	0	0	0	0	0	0	0	0	0	82077	0	0	79312	0	86754	76184	62479	67609	103363	89306	0	0	44176	53662	0	63732	52146	59538
284.19840 Da 803.70 s	13.4	285.206		C12H24N6O2	0	0	0	0	0	0	0	0	0	0	0	0	0	0	0	959	1034	989	0	0	0	1593	1315	1131	1314	0	1135	1302	1194	1263	1310	1200	0	1142	1410	1304	1320	1331	1204	1280
174.12365 Da 803.43 s	13.39	175.131		C9H18O3	25264	24454	0	25227	24249	21576	22672	21855	0	22104	0	21635	20681	0	21194	20118	20992	20571	22171	20544	12780	11966	11837	12346	12342	13303	14023	12063	10147	10922	16603	14152	9383	7568	6972	7970	8948	9914	8655	9959
279.24211 Da 803.59 s	13.39	280.249			1122	1040	1150	1123	1023	876	969	0	1069	892	1209	0	0	1113	0	706	586	846	0	825	0	1123	1207	1199	1248	0	1233	1220	1189	1237	1305	1149	0	1159	1232	1235	1234	1084	1225	1108
260.13859 Da 805.45 s	13.42	261.146		C12H16N6O	0	0	178	0	0	0	0	0	225	0	0	0	0	0	174	0	0	0	0	0	1297	1384	1145	1346	1281	0	1369	1327	1261	1385	1365	1297	0	1295	1368	1461	1376	1352	1340	1269
220.14633 Da 806.12 s	13.44	221.154		C10H16N6	714	324	1832	294	0	264	539	0	6707	0	1734	390	0	7149	0	0	383	0	343	414	1324	1421	1496	1559	1266	1541	1295	1425	1386	1381	1430	1373	1336	1187	1401	1448	1503	1374	1326	1452
252.17363 Da 807.52 s	13.46	275.163		C15H24O3	0	0	0	0	0	0	0	0	0	0	0	0	0	0	0	0	0	0	0	0	0	9102	8514	8424	8699	0	8459	8181	9009	8885	8220	7881	0	8515	7836	8759	9238	8099	8846	9231
196.10819 Da 807.57 s	13.46	197.115		C11H16O3	0	2096	0	0	0	0	0	0	0	0	0	0	0	0	0	0	0	0	0	0	1523	1671	1510	1585	1526	0	0	0	1567	1590	1622	1529	1502	1571	1446	1438	1466	1456	1540	1471
295.21643 Da 809.31 s	13.49	296.224		C10H29N7OS	0	0	0	0	0	0	0	0	0	0	0	0	0	0	0	0	0	0	0	0	0	1703	1652	1557	1719	0	1578	1403	1527	1493	1451	1341	0	1074	1373	1279	1190	1320	1257	1168
196.14854 Da 811.08 s	13.52	197.156		C12H20O2	23814	24208	0	25745	26143	26835	23846	28058	0	26938	1199	27415	27943	0	27834	27886	29168	30285	28976	29495	454	519	504	519	434	505	478	442	461	594	423	416	421	341	420	624	477	448	476	444
240.16972 Da 815.36 s	13.59	241.177		C10H20N6O	1663	1361	876	1435	1387	1602	1463	0	304	1436	462	822	449	1628	0	0	0	0	0	0	1628	1633	1918	0	0	1602	1449	1380	1400	1670	1585	1392	1493	1555	1601	1465	1591	1679	1453	2007
218.18802 Da 817.37 s	13.62	219.195		C8H22N6O	1760	1651	391	0	1912	1609	0	1428	367	1659	418	1313	1519	0	1692	1601	1614	1785	1492	1640	2103	2118	2147	2107	2503	2334	2267	2124	2158	2096	2290	2376	2277	2052	2342	1891	2502	2116	2222	2354
250.15763 Da 817.80 s	13.63	251.165		C15H22O3	644	533	662	627	545	253	204	0	812	652	577	0	0	615	0	308	340	0	0	0	5680	5658	5698	5660	6043	6198	5242	5658	5256	5965	5461	5496	5272	5174	5532	5407	5224	5107	5346	5390
236.14003 Da 820.56 s	13.68	237.147		C10H16N6O	665	729	636	694	714	697	573	358	842	905	686	0	341	767	459	409	0	296	0	338	1670	1543	1448	1565	1590	1390	1501	1434	1624	1549	1542	1492	1414	1438	1559	1529	1721	1612	1394	1743
252.17477 Da 827.43 s	13.79	275.163		C15H24O3	0	0	0	0	0	0	0	0	0	0	0	0	0	0	0	0	0	0	0	0	0	14220	14928	14567	14754	0	15248	14645	15453	15239	14520	14423	0	14346	15076	14261	13969	14375	14169	15265
166.02084 Da 834.48 s	13.91	149.015		C10H2N2O	26441	22128	0	15516	13649	11664	9280	8479	0	7312	0	5406	5638	0	5572	5081	0	4900	4150	3783	1200	0	1311	1830	0	1426	0	0	0	0	0	0	1214	1107	0	885	919	863	902	774
276.23027 Da 834.68 s	13.91	277.238		C15H32O4	1139	1226	75305	1344	1141	1143	1190	1148	77980	1279	71144	1049	1041	73238	0	0	0	0	1063	1087	0	2148	1828	1989	1567	0	1696	1432	1779	1836	2079	4322	0	1655	1867	1926	1769	3536	1620	1572
298.21244 Da 836.97 s	13.95	299.22		C13H26N6O2	4254	4475	4004	4599	4545	4529	4676	651	3789	4776	4687	665	601	4572	615	0	716	591	790	559	0	4861	4168	3879	3734	0	3484	3595	4065	4345	4821	10172	0	3691	4298	4421	3992	9424	3762	4104
250.15704 Da 843.81 s	14.06	251.164		C11H18N6O	0	0	0	0	165	0	171	0	0	0	0	0	173	0	217	0	0	0	0	0	0	1235	1341	1199	1195	1279	1149	1295	1207	1268	1339	1414	1062	1098	1092	1070	1031	1089	0	1053
236.17809 Da 847.74 s	14.13	237.185		C15H24O2	0	185	246	0	0	0	0	456	348	0	0	576	392	0	449	271	521	190	463	377	11690	10326	11653	11402	11262	9572	11322	10775	10338	11327	11228	10966	9889	10594	10148	9879	10552	10449	10107	10161
194.16785 Da 849.44 s	14.16	195.175		C13H22O	17866	16783	602	18333	18529	18042	18794	19859	480	19258	532	19701	18799	556	20476	21026	21024	21478	20395	21674	1106	894	1010	879	841	825	882	729	877	929	924	869	794	1000	739	839	834	862	920	879
199.19374 Da 850.12 s	14.17	200.201		C12H25NO	4733	5022	0	5365	4330	7051	0	4982	0	4197	0	3943	3527	0	2329	3193	3721	3611	3650	3111	92907	96140	97970	93529	94945	96008	96145	91748	94777	94838	98554	91512	91946	91675	96665	95741	100589	91730	95147	95513
234.16316 Da 860.81 s	14.35	235.17		C15H22O2	352	0	0	544	483	0	513	0	485	473	0	0	0	0	0	199063	200183	204572	0	0	10319	10923	10147	10116	10293	10800	10111	9774	9331	9876	10185	9156	9400	9585	8519	10007	9899	9060	10175	9682
248.17841 Da 862.85 s	14.38	249.186		C16H24O2	0	0	0	0	0	0	0	0	0	0	0	0	0	0	0	244701	240080	247870	0	0	5261	5371	5003	5712	5883	0	5221	4855	4697	5730	5719	4545	4631	4555	4700	5262	5273	4795	5277	5089
220.11242 Da 869.95 s	14.5	221.118		C9H12N6O	0	0	0	0	0	0	0	36681	0	0	0	36741	36686	0	37232	36702	36504	36877	38591	37425	2716	2795	2941	2857	3039	2950	2896	3061	2829	3319	2765	2992	2320	2628	2649	2925	2596	2511	2748	2432
276.20730 Da 869.34 s	14.49	277.215		C14H24N6	29784	29111	0	32159	29606	30478	0	28945	0	30209	0	28319	29109	0	30476	0	0	0	29703	0	0	1284	998	1138	1042	0	1103	1189	1063	1237	1285	1110	0	1132	1066	1169	1191	1103	1019	0
298.15631 Da 870.01 s	14.5	299.164		C15H18N6O	0	0	0	0	0	0	0	0	0	0	0	0	0	0	0	0	0	0	0	0	0	5146	5656	5712	4912	0	5953	5539	5754	5806	5992	5180	0	5698	5997	5190	5745	5403	5291	5861
202.10078 Da 885.27 s	14.75	203.108		C13H14O2	0	0	0	25840	26156	24887	0	26120	0	26079	0	25824	24520	0	25963	26320	25546	29224	28090	26645	750	799	967	894	925	892	838	731	950	717	850	761	797	770	765	827	698	860	695	864
246.22037 Da 890.63 s	14.84	247.228		C14H30O3	0	0	0	0	0	0	0	0	511	0	455	0	0	367	0	29927	26743	32335	0	0	17315	12560	15388	14715	20990	0	15408	12993	8286	7547	15249	14884	9350	15218	8050	14340	14944	10871	9780	15093
290.24665 Da 890.51 s	14.84	291.254		C16H34O4	0	0	0	0	0	0	0	0	0	0	0	0	0	0	0	650	0	0	0	0	0	9736	8932	6045	18593	0	11452	17760	7138	6060	13200	11038	0	8363	5211	13834	18586	10536	5211	11104
312.22937 Da 890.63 s	14.84	313.237		C14H28N6O2	0	0	0	0	0	0	0	0	0	0	0	0	0	0	0	0	0	0	0	0	0	26036	0	16212	49612	0	30756	46663	18001	15565	35542	30150	0	24385	14243	38376	50303	26713	13650	29862
268.20240 Da 890.77 s	14.85	269.21		C12H24N6O	0	0	0	0	0	0	0	0	0	0	0	0	0	0	0	0	0	0	0	0	0	36560	40477	40645	50899	0	39464	34974	25907	21619	37833	40671	0	43975	24182	36333	41103	30790	29555	40061
316.20313 Da 892.93 s	14.88	317.21		C16H24N6O	0	0	0	0	0	0	0	1147	0	0	0	1127	1114	0	1258	0	252	229	245	1121	690	4311	0	4505	4768	701	4426	4274	3909	4567	4542	4309	0	4101	4203	4250	4611	4411	4348	4593
268.24072 Da 899.52 s	14.99	269.248		C13H28N6	6838	0	0	1057	0	916	6158	1193	0	1112	0	0	906	0	1208	0	1839	1458	1036	1022	0	3222	3523	3379	3249	0	3228	3206	3419	3497	3866	3278	0	2889	3202	3447	3029	3176	3111	3358
290.22423 Da 900.74 s	15.01	291.232		C15H26N6	0	0	0	0	0	0	0	0	0	0	0	0	0	0	0	0	0	0	0	0	0	6041	6154	6488	6258	0	6240	5923	5799	6406	7314	6131	0	5634	5869	6189	5935	5808	5993	6047
278.15350 Da 911.87 s	15.2	301.143		C16H22O4	0	0	0	0	0	0	0	0	0	0	0	0	0	0	0	0	0	0	0	0	0	78555	79715	81666	76337	0	73279	78420	77968	78773	84162	79186	0	73168	79228	78232	82612	77845	76748	79992
272.20007 Da 929.80 s	15.5	295.19		C15H28O4	0	0	0	0	0	0	0	0	0	0	0	0	0	0	0	0	0	0	0	0	0	4910	5216	4645	4686	0	4485	4559	4303	4077	5746	4500	0	3243	3547	3736	4101	3893	3296	4257
326.24520 Da 931.86 s	15.53	327.252		C15H30N6O2	0	0	0	0	0	0	0	590	0	0	573	630	586	577	614	630	631	627	625	579	0	4123	0	4163	4062	0	4243	3711	3571	3927	3787	3917	1032	3501	3630	3566	3777	3653	3472	3985
282.21932 Da 938.52 s	15.64	283.227		C13H26N6O	0	0	0	0	0	0	0	0	0	0	0	0	0	0	0	0	0	0	0	0	1158	1245	1484	1299	1265	1062	1219	1228	1343	1178	1339	1586	958	1093	1262	1222	1230	1320	1407	1329
304.26122 Da 944.20 s	15.74	305.269		C13H32N6O2	0	0	0	0	0	0	0	1158	0	0	0	1137	0	0	0	1139	1133	1289	1130	1079	1422	4345	4163	4442	4592	1341	4446	3946	4124	4380	4922	5683	1338	3774	3715	3957	4399	4010	3834	4097
326.24569 Da 946.22 s	15.77	327.253		C12H34N6O2S	0	0	0	0	0	0	0	533	0	0	0	539	601	669	589	601	640	528	583	570	0	10918	1194	1245	10260	1355	9819	9778	10214	10714	11194	14938	0	8844	9750	8896	1408	9820	9484	10370
260.23645 Da 946.39 s	15.77	283.226		C15H32O3	0	0	0	0	0	0	0	0	0	0	0	0	0	257	0	0	0	0	0	0	0	12340	11323	11869	11145	0	11365	11139	11123	12306	11272	14842	0	10691	11113	11090	12071	12740	12434	12713
269.27277 Da 950.81 s	15.85	270.28		C17H35NO	0	0	231	211	230	0	0	0	216	0	0	0	0	294	0	0	0	0	0	0	0	19681	21106	19910	20230	0	19818	19705	20016	20651	21466	19447	0	19545	18844	19575	20956	19023	18838	20222
227.22558 Da 961.06 s	16.02	228.233		C14H29NO	0	0	0	0	0	0	0	0	0	0	0	0	0	0	3049	4453	3716	4013	0	3589	10287	10702	11468	13110	11588	13325	13062	11961	12350	13434	14260	13493	11974	11285	12468	13471	14068	12971	13575	13912
286.21636 Da 963.41 s	16.06	309.206		C16H30O4	0	0	0	0	0	0	0	0	0	0	0	0	0	0	0	0	0	0	0	0	0	10874	11616	11902	11302	0	10832	10886	11184	11299	12325	11165	0	10580	10814	10727	11208	10434	11075	10460
314.22415 Da 967.76 s	16.13	315.231		C17H26N6	0	0	0	0	0	0	0	0	0	0	0	0	0	0	0	0	0	0	0	0	0	3439	0	4498	4101	0	4316	3871	3863	4354	4976	3869	0	3569	3856	3891	3816	4228	3915	4254
292.24151 Da 967.88 s	16.13	293.249		C12H32N6S	0	0	449	0	0	0	0	0	0	0	0	0	0	0	0	330	291	462	0	0	0	1370	1325	1358	1372	0	1578	1335	1346	1382	1520	1232	0	1306	1255	1438	1302	1479	1391	1369
462.20416 Da 991.29 s	16.52	463.211			15281	15865	12326	12098	11436	9670	10341	0	9552	8823	7901	0	7895	7665	8045	7062	7840	7254	7392	0	0	0	3192	0	0	0	0	0	0	0	0	0	0	0	0	0	0	0	0	0
484.18128 Da 991.43 s	16.52	485.189			0	0	0	2313	1993	1836	1839	1971	1738	1764	1646	1570	1680	1455	0	1553	1442	1473	1372	1321	7911	0	0	0	0	2356	0	0	0	0	0	0	0	6547	0	0	0	0	0	0
274.25218 Da 998.30 s	16.64	297.242		C16H34O3	0	111	0	0	0	0	0	0	0	0	0	0	0	0	0	0	0	0	0	0	0	39731	40968	44680	44654	0	45831	43885	42795	45429	49277	44709	0	44036	43458	45866	50034	48041	49228	48582
312.17232 Da 1019.26 s	16.99	313.18		C16H20N6O	0	0	0	0	0	0	0	0	0	0	0	0	0	0	128	0	0	0	0	0	0	2000	0	2027	2070	766	2089	1907	1962	2153	1934	1944	0	1805	2013	2077	2089	1891	2153	2227
290.18912 Da 1019.35 s	16.99	291.196		C18H26O3	0	0	0	0	0	0	0	0	0	0	0	0	0	0	0	0	671	572	0	0	0	1362	1324	1332	1168	0	1434	1410	1375	1442	1283	1264	0	1181	1427	1311	1262	1208	1416	1332
178.06006 Da 1021.50 s	17.02	179.069	_S_-Isosclerone	C10H10O3	5480	4937	0	5312	5507	5715	5436	4983	0	4963	0	5875	9190	0	5795	6511	5771	5293	5426	5208	2678	2593	2285	2571	2409	2705	2354	2361	3006	2531	2922	2858	2379	2396	2639	3064	2881	2599	2468	2676
336.23000 Da 1036.84 s	17.28	337.237		C16H28N6O2	0	0	0	0	0	0	0	0	0	0	0	0	0	0	0	0	0	0	0	0	0	5715	0	0	4909	0	5763	5433	4951	5105	5973	6182	0	3909	4088	4309	4272	4860	4118	4483
314.24752 Da 1037.03 s	17.28	315.255		C18H34O4	0	0	0	0	0	0	0	0	0	0	0	0	0	0	0	0	0	0	0	0	0	5194	0	5026	5244	0	5125	4600	4968	4906	5785	5652	0	4016	3848	3967	4365	4205	3747	4293
255.25739 Da 1061.59 s	17.69	256.265		C16H33NO	0	0	0	0	0	0	0	0	0	0	0	0	0	0	0	0	49070	44939	0	0	12732	12538	13135	12796	12673	0	12101	11623	11372	13222	13875	12951	11699	11359	13231	15282	13911	14050	13638	13334
277.23899 Da 1061.65 s	17.69	278.246		C13H31N3O3	0	0	0	0	0	0	0	0	0	0	0	0	0	0	0	452	386	488	0	0	0	2160	1954	2378	1742	0	1967	1822	2028	0	2492	2201	0	2171	2443	2444	2463	2407	0	2711
364.27903 Da 1065.62 s	17.76	365.286			132	0	0	0	0	0	0	0	0	0	0	0	0	0	0	0	0	0	0	0	0	10940	0	0	11172	0	11479	11293	11503	11667	11905	12106	0	0	12033	11751	10714	12905	12332	12384
324.28682 Da 1067.99 s	17.8	325.294		C21H40S	0	0	0	0	0	0	0	0	0	0	0	0	0	0	0	0	0	0	0	0	0	29287	0	29727	29549	0	28992	28374	28027	29869	29793	28925	0	26976	26580	27011	27216	26295	27093	27632
342.29625 Da 1068.25 s	17.8	343.304		C21H42OS	0	0	0	0	0	0	0	0	0	0	0	0	0	0	0	0	0	0	0	0	0	6417	0	0	7095	0	6936	6590	6541	6984	6302	6286	0	0	6568	6909	0	6852	6105	6615
166.02381 Da 1133.01 s	18.88	149.021		C8H6O4	18417	19607	0	18143	17593	21344	0	17125	0	17728	0	15914	15180	0	15620	17331	15883	18019	17112	15381	0	9397	9272	10398	9426	9610	9813	8998	8266	9034	8425	9230	8373	7664	8473	7727	8246	7534	7755	7577
390.27772 Da 1133.12 s	18.89	413.267	Bis_2-ethylhexyl_ phthalate	C24H38O4	0	0	0	0	0	0	0	0	0	0	0	0	0	0	0	0	0	0	0	0	0	100896	0	0	101309	0	97119	97264	97747	106657	91212	100348	0	0	92465	94890	0	90137	90193	0
278.15042 Da 1133.12 s	18.89	279.16		C16H22O4	0	0	331	0	0	0	0	0	299	0	261	0	0	224	0	0	0	0	0	0	0	6600	6784	6792	6819	0	6419	5790	5976	6046	6724	5915	0	5422	5786	5344	6002	5231	5087	5702
Raw data of LC-MS negative mode, related to figure 2, S1 and S2
Bucket label	RT	m/z	Name	Formula	K100_CT1_25_01_1617	K100_CT2_26_01_1618	K100_CT3_27_01_1619	K100_CT4_28_01_1620	K100_CT5_29_01_1621	K100_IC25-1_30_01_1623	K100_IC25-2_31_01_1624	K100_IC25-3_32_01_1625	K100_IC25-4_33_01_1626	K100_IC25-5_34_01_1627	K100_IC50-1_35_01_1629	K100_IC50-2_36_01_1630	K100_IC50-3_37_01_1631	K100_IC50-4_38_01_1632	K100_IC50-5_39_01_1633	K100_IC75-1_40_01_1635	K100_IC75-2_41_01_1636	K100_IC75-3_42_01_1637	K100_IC75-4_43_01_1638	K100_IC75-5_44_01_1639	K213_CT1_25_01_1749	K213_CT2_26_01_1750	K213_CT3_27_01_1751	K213_CT4_28_01_1752	K213_CT5_29_01_1753	K213_IC25-1_30_01_1755	K213_IC25-2_31_01_1756	K213_IC25-3_32_01_1757	K213_IC25-4_33_01_1758	K213_IC25-5_34_01_1759	K213_IC50-1_35_01_1761	K213_IC50-2_36_01_1762	K213_IC50-3_37_01_1763	K213_IC50-4_38_01_1764	K213_IC50-5_39_01_1765	K213_IC75-1_40_01_1767	K213_IC75-2_41_01_1768	K213_IC75-3_42_01_1769	K213_IC75-4_43_01_1770	K213_IC75-5_44_01_1771
group					KKU100-CT	KKU100-CT	KKU100-CT	KKU100-CT	KKU100-CT	KKU100-IC25	KKU100-IC25	KKU100-IC25	KKU100-IC25	KKU100-IC25	KKU100-IC50	KKU100-IC50	KKU100-IC50	KKU100-IC50	KKU100-IC50	KKU100-IC75	KKU100-IC75	KKU100-IC75	KKU100-IC75	KKU100-IC75	KKU213-CT	KKU213-CT	KKU213-CT	KKU213-CT	KKU213-CT	KKU213-IC25	KKU213-IC25	KKU213-IC25	KKU213-IC25	KKU213-IC25	KKU213-IC50	KKU213-IC50	KKU213-IC50	KKU213-IC50	KKU213-IC50	KKU213-IC75	KKU213-IC75	KKU213-IC75	KKU213-IC75	KKU213-IC75
165.94991 Da 60.23 s	1	164.943			3533	3002	0	4498	0	0	4100	0	0	0	3698	4393	5403	4789	5057	4560	4728	5984	4254	5323	0	6834	6838	6871	6267	4178	1070	6129	1307	6238	319	6334	0	0	6880	0	332	6870	7988	5704
161.91021 Da 60.72 s	1.01	160.903			1548	1674	0	2091	0	0	1975	0	0	0	1784	2142	2065	2509	1377	2000	1642	1665	2106	1696	0	1317	2552	1757	2243	0	0	1819	0	1599	0	1454	0	0	1839	0	0	1995	1973	1577
93.91118 Da 62.10 s	1.04	92.9039			51354	53188	0	64069	0	0	64517	0	0	0	54143	67266	55732	56597	0	0	52993	57367	0	0	59154	58800	0	62961	67164	40174	73582	0	59631	0	0	58128	0	0	0	0	0	68076	71809	62703
182.05787 Da 62.49 s	1.04	181.051		C5H6N6O2	51749	3964	0	3862	0	0	5877	0	0	0	8558	6749	8766	8395	0	9599	7524	8516	0	5551	0	3543	2898	2691	2434	164	0	0	0	0	0	3584	0	0	3227	0	0	3333	2678	3026
151.88723 Da 63.25 s	1.05	150.88			2841	3375	0	3765	0	0	3558	0	0	244	3217	4113	2947	3679	2414	3900	2688	2902	3566	2596	0	3025	0	3500	3943	10519	0	4052	0	3346	0	2864	0	0	0	0	0	3430	3889	2798
183.00669 Da 64.02 s	1.07	181.999			2964	2615	8431	3618	2765	0	2720	2043	0	0	3470	2931	5287	3776	0	3137	3476	4686	0	4814	0	2590	1729	2169	2340	0	0	2676	0	3049	1672	3131	1417	2508	1800	1005	0	751	1222	1514
180.04174 Da 64.18 s	1.07	179.034		C5H4N6O2	2101	1830	578	1703	734	663	1197	705	576	860	1406	1421	1063	1122	0	1600	1043	1210	928	1316	1331	3954	3070	2830	3701	442	335	2663	0	3126	471	3070	485	474	0	502	578	2222	2369	2853
125.05219 Da 65.15 s	1.09	124.045		C6H7NO2	0	0	39423	0	37767	18403	0	20823	24762	19873	0	0	0	0	13778	0	0	0	13048	0	0	0	0	0	0	0	13193	15146	0	17864	7779	0	9314	8627	0	4620	6208	0	0	0
166.03264 Da 65.15 s	1.09	165.025		C6H6N4S	1224	1891	0	1807	0	0	1435	0	133	0	1275	1155	1634	1243	1390	1020	1035	1485	1627	1706	0	1679	1369	1291	1183	656	0	791	0	952	0	1674	0	0	863	0	0	1300	1117	1371
171.89044 Da 65.49 s	1.09	170.883			1605	1444	0	1699	3890	3931	1476	3418	2974	4041	2182	1624	2058	1803	1941	2063	1644	2570	2094	2174	0	2055	1663	2584	2298	1388	0	2149	0	2253	1338	2830	1458	1542	2215	2202	1357	1759	1841	2264
177.92252 Da 69.26 s	1.15	176.915			5753	9523	0	8744	0	0	10285	0	0	0	10213	12803	12303	9232	10166	9226	10879	12416	11410	11566	0	10616	11278	13315	11617	3605	451	10251	0	9790	0	10201	0	0	0	0	0	10690	13971	10560
161.83594 Da 69.79 s	1.16	160.829			19334	21414	0	19226	0	0	18715	0	0	0	15738	15322	13237	18148	18211	11833	16711	14182	15017	14567	0	0	14794	14290	12206	7268	0	11907	0	11782	0	12088	0	0	0	0	0	0	0	15419
95.97539 Da 70.60 s	1.18	94.9681			1114	1321	11467	1097	26084	10982	1279	10440	10227	12138	1166	1135	1514	1402	0	0	1422	1273	0	8855	1343	1028	0	1062	1145	688	1044	0	1471	0	46656	1192	50841	40619	0	45531	48359	1227	1126	1177
196.78813 Da 74.48 s	1.24	195.781			12015	14131	0	15166	0	0	15719	0	0	0	16933	0	17084	16797	0	15156	17151	17762	0	0	11614	0	0	11596	10255	13585	0	0	0	0	0	8444	0	0	0	0	0	13122	12428	12841
134.05989 Da 76.45 s	1.27	133.053		C5H10O4	0	1312	87481	754	81927	123149	795	188550	182598	117647	815	1585	1612	1051	0	1121	0	252	0	1545	0	0	0	1185	770	333	0	0	1544	234206	157868	0	142324	160606	0	113423	153878	478	693	0
173.99766 Da 79.03 s	1.32	172.99		C6H6O4S	4652	2819	0	4774	0	0	4647	167	242	0	8090	7256	8143	12620	6761	7472	6348	6538	11408	6728	494	6123	962	6355	4667	4104	384	3357	0	5611	0	4765	0	0	4945	0	0	192	531	4448
175.02905 Da 79.11 s	1.32	174.022		C9H5NO3	50531	38752	0	31754	0	0	50050	0	0	0	74068	61708	46894	43632	53284	77289	62761	43986	43510	58923	203	2966	3060	2395	2439	5383	0	2770	0	2596	0	3877	0	0	2890	0	0	3950	4437	4501
90.05993 Da 80.41 s	1.34	89.0527			0	0	0	0	95355	71719	0	124753	82973	93682	0	0	0	0	0	0	0	0	0	0	0	0	0	0	0	0	0	0	0	0	80220	0	3994	47844	0	78854	105943	0	0	0
90.00165 Da 81.63 s	1.36	88.9944			15187	11972	0	68506	238	530	68926	0	0	534	79027	74499	117596	73265	0	391	69951	102894	0	0	0	135483	0	51675	112163	85102	109531	0	84102	0	1027	156384	1811	793	0	1730	982	102225	44854	84859
148.03263 Da 82.00 s	1.37	147.025			1221	1038	2375	1678	2196	2065	1316	2702	1991	2311	1679	1552	3716	2419	2602	2425	0	3653	2770	2606	834	1030	1035	2939	2486	2262	584	2069	0	2016	6487	2507	0	5183	0	7618	8829	2919	2795	0
147.98758 Da 85.65 s	1.43	146.98			0	1356	238	1722	233	390	1862	305	407	306	1665	1828	2498	1736	2006	1875	1313	1957	1647	2291	2033	0	0	5407	7492	6345	0	8104	498	8723	0	8835	216	389	0	456	0	9055	4637	0
174.07210 Da 445.05 s	7.42	173.065		C5H10N4O3	1991	1174	0	2024	0	0	1853	0	0	0	1711	1969	1979	1935	0	1653	2472	1827	0	1731	0	1547	1399	1625	1526	5150	0	0	0	1377	0	1870	0	0	1390	0	0	1250	1434	1419
128.11999 Da 464.52 s	7.74	127.113		C8H16O	0	0	2106	0	1978	2058	0	2673	2288	2228	0	0	0	0	2279	0	0	0	2134	1720	0	0	0	0	0	0	2578	2905	0	2474	2940	0	3095	2693	0	2724	2784	0	0	0
172.12160 Da 464.95 s	7.75	171.114		C8H16N2O2	0	0	5000	0	5536	5753	0	5922	5739	6029	0	0	0	0	0	0	0	0	0	0	0	0	0	0	0	0	0	0	0	0	8449	0	8326	7889	0	7934	7747	0	0	0
172.05673 Da 465.56 s	7.76	171.049		C5H8N4O3	6261	5546	0	5609	0	0	5120	0	0	0	5411	6231	5986	6242	5395	6184	5587	5642	6037	4996	0	7939	7521	7612	8087	8715	776	8288	667	7585	0	7956	0	0	8110	0	0	8242	7703	8693
194.02917 Da 474.83 s	7.91	193.022		C7H6N4OS	2144	2036	0	1922	0	0	2173	0	0	0	2238	2099	2331	2233	0	2163	2143	2220	0	0	3626	0	0	3655	3524	3445	107	0	0	0	0	3950	0	0	0	0	0	4271	4276	3922
188.15669 Da 498.09 s	8.3	187.149		C9H20N2O2	0	0	0	0	6079	6041	0	5947	6809	6118	0	0	0	0	0	0	0	0	0	0	0	0	0	0	0	0	0	0	0	0	5702	0	5338	4308	0	4867	4558	0	0	0
188.08072 Da 498.29 s	8.3	187.073		C8H8N6	6218	5477	0	6194	0	0	6492	0	0	0	5565	6055	6144	5471	0	4988	8635	5590	0	0	0	5168	4991	5149	4775	19264	0	0	0	0	0	5881	0	0	0	0	0	4814	4625	4555
210.05097 Da 504.30 s	8.4	209.044		C10H10O5	2838	3135	0	2985	0	0	3059	0	0	0	3075	3353	3231	2905	0	3418	2951	2782	0	0	0	0	0	1513	1350	2086	237	1383	0	1254	0	1241	0	0	0	0	0	1181	1174	1311
228.16028 Da 507.13 s	8.45	227.153		C10H20N4O2	0	0	0	0	4273	4213	0	4210	4457	4463	0	0	0	0	0	0	0	0	0	0	0	0	0	0	0	0	0	0	0	0	3226	0	3581	3424	0	3282	3538	0	0	0
152.07750 Da 513.10 s	8.55	151.07		C4H12N2O4	1603	1639	414	1636	395	536	1956	629	835	391	1904	2212	1862	1833	1980	2068	2003	2058	2235	2252	0	1663	0	2657	2715	2800	0	2867	420	2791	514	2571	616	413	0	537	458	2925	2864	2835
202.08766 Da 548.77 s	9.15	201.08		C10H18S2	2965	2578	0	2888	0	0	3158	0	0	0	3021	2916	2836	2660	0	2492	3411	2795	0	0	1536	0	0	1638	1585	3224	0	0	0	0	0	1969	0	0	0	0	0	1630	1552	1429
216.09607 Da 596.39 s	9.94	215.089		C6H12N6O3	1621	1400	0	1434	0	0	1555	0	0	0	0	0	1557	1452	0	1538	1777	1463	0	0	0	236	0	1355	1414	2216	0	1377	0	1183	0	0	0	0	0	0	0	1316	1156	1544
226.21720 Da 611.28 s	10.19	225.21		C12H26N4	0	0	0	0	3150	3044	0	3402	3657	3307	0	0	0	0	0	0	0	0	0	0	0	0	0	0	0	0	177	0	0	0	7548	0	8079	7735	0	7939	8683	0	0	0
166.08483 Da 639.86 s	10.66	165.078		C7H10N4O	1100	1010	246	966	357	373	1056	243	251	376	1054	1099	1149	1287	1218	1056	1079	1176	1132	1111	0	1187	1312	1270	1225	499	0	1158	0	1060	174	1249	247	275	1631	239	199	1131	1106	1293
222.18489 Da 660.72 s	11.01	221.178		C12H22N4	0	0	0	0	10903	11213	0	11619	11761	11466	0	0	0	0	0	0	0	0	0	0	0	0	0	0	0	0	0	0	652	0	16663	0	16594	16869	0	17453	16832	0	0	0
208.07398 Da 667.05 s	11.12	207.067		C12H8N4	1213	1008	0	1254	0	0	1011	0	0	0	1266	0	1268	1124	0	1197	1154	1325	0	0	1927	0	0	1996	2194	2034	0	2231	0	1889	0	1918	0	0	0	0	0	1957	1940	2041
194.06557 Da 673.75 s	11.23	193.058		C8H10N4S	4897	4381	0	4750	0	0	4590	0	0	0	4710	4237	4826	4444	0	4218	4044	4668	0	0	3952	0	0	3789	4053	3494	0	0	118	0	0	3993	0	0	0	0	0	4246	3453	3929
224.20112 Da 687.47 s	11.46	223.194		C12H24N4	0	0	0	0	4842	4382	0	4769	4966	5412	0	0	0	0	0	0	0	0	0	0	0	0	0	0	0	0	0	0	0	0	10617	0	10272	10713	0	10406	10870	0	0	0
178.08027 Da 690.13 s	11.5	177.073		C14H10	2112	2153	0	2133	0	0	2441	0	0	0	2781	2426	2370	2237	0	2380	2474	2657	0	2647	0	4502	4004	3889	4485	4133	197	0	221	0	0	4249	0	0	3902	0	0	4068	4594	4097
192.08715 Da 692.13 s	11.54	191.08		C10H12N2O2	1776	1711	0	1858	0	0	1733	0	0	0	1724	1980	1715	1764	0	1840	1628	1897	0	0	2561	0	0	2571	2735	2594	0	0	0	0	0	2687	0	0	0	0	0	2809	2838	2706
294.25768 Da 718.27 s	11.97	293.25		C15H30N6	0	0	0	0	174573	171027	0	175165	174775	176541	0	0	0	0	0	0	0	0	0	0	0	0	0	0	0	0	0	0	150591	0	154917	0	155122	158327	0	155503	155807	0	0	0
310.25656 Da 732.50 s	12.21	309.249		C13H34N4O4	0	0	0	0	28525	28113	0	0	29901	28181	0	0	0	0	0	0	0	0	0	0	0	0	0	0	0	0	0	0	0	0	33858	0	33273	32810	0	34720	34637	0	0	0
194.06510 Da 736.28 s	12.27	193.058		C8H10N4S	1107	1344	0	1182	0	0	1201	0	0	0	1048	1222	1187	1185	0	1365	1521	1222	0	1105	1321	0	0	1459	1710	1536	0	0	0	0	0	1598	0	0	0	0	0	1464	1422	1535
196.11625 Da 743.25 s	12.39	195.109		C8H20O3S	2292	2287	0	2590	0	0	2274	0	0	0	2618	2439	2698	2310	2211	2594	2375	2365	2030	0	3482	2310	2482	3624	3753	3815	264	2694	325	0	0	3601	0	0	2459	0	0	3900	3623	3551
240.19963 Da 746.58 s	12.44	239.192		C12H24N4O	0	0	4713	0	4902	5027	0	4957	4920	5687	0	0	0	0	0	0	0	0	0	0	0	0	0	0	0	0	0	0	0	0	9256	0	8774	9218	0	8589	9256	0	0	0
194.13755 Da 763.11 s	12.72	193.13		C6H18N4O3	1553	1612	166	0	121	180	1533	183	156	178	1576	1764	1716	1576	0	1576	1572	1668	0	0	1953	0	0	2182	1726	0	0	0	0	0	171	0	198	116	0	0	151	1942	2151	2127
188.11704 Da 763.97 s	12.73	187.11		C8H16N2O3	986	1069	0	900	0	0	1143	0	0	0	1276	1332	1258	1370	0	1286	1281	1167	0	0	0	1858	1750	1706	1662	1596	0	0	0	0	0	1787	0	0	0	0	0	1577	1560	1528
195.05988 Da 765.90 s	12.76	194.053		C7H9N5S	92961	90976	0	94861	0	0	96939	0	0	0	100131	101562	100532	100625	0	101474	100533	101620	0	0	132232	0	0	132930	133486	132803	0	0	0	0	0	134224	0	0	0	0	0	137141	130922	138490
195.14296 Da 766.02 s	12.77	194.136		C7H21N3OS	230	265	0	317	92283	95453	402	97666	99796	99834	419	278	308	287	351	375	386	286	332	332	444	442	309	354	414	385	0	372	0	360	135155	388	133058	137336	312	137118	136441	299	312	377
267.17969 Da 778.65 s	12.98	266.172		C11H21N7O	0	0	0	0	17103	16090	0	17686	17419	17357	0	0	0	0	0	0	0	0	0	0	0	0	0	0	0	0	0	0	0	0	18273	0	18057	18411	0	19268	17772	0	0	0
276.12975 Da 783.18 s	13.05	275.122		C15H20N2OS	1013	2287	0	2396	0	0	2628	0	0	0	2374	2440	2204	2401	2401	2425	0	1299	2349	2476	0	0	3088	3215	3085	3265	0	1460	0	1522	0	1683	0	0	3123	0	0	3349	3267	1754
278.25982 Da 809.78 s	13.5	277.253		C19H34O	0	0	0	0	319021	338089	0	320281	326727	344327	0	0	0	0	0	0	0	0	0	0	0	0	0	0	0	0	0	0	431819	0	432388	0	423264	442045	0	426149	450419	0	0	0
444.35303 Da 825.99 s	13.77	443.346		C20H44N8O3	572	0	0	2525	2600	2453	2399	2413	2431	2516	666	544	2704	606	600	849	0	648	507	551	0	0	2962	3277	3056	2962	0	0	0	0	2838	0	2778	2798	0	2838	3246	3305	2906	0
234.22392 Da 861.37 s	14.36	233.217			0	0	0	0	13995	14080	0	14128	15921	15539	0	0	0	0	0	0	0	0	0	0	0	0	0	0	0	0	0	0	0	0	26716	0	26667	26753	0	27805	27069	0	0	0
222.22125 Da 864.25 s	14.4	221.214			0	0	0	0	17877	18488	0	18937	19346	18905	0	0	0	0	0	0	0	0	0	0	0	0	0	0	0	0	0	0	0	0	22014	0	22093	21897	0	22638	21505	0	0	0
163.83607 Da 887.10 s	14.79	162.829			5926	5756	0	6019	0	0	6268	0	0	0	6261	6234	5064	5047	6064	4987	5978	6509	6206	6126	0	4536	4439	5277	4412	5001	0	5160	0	5293	0	3965	0	0	3968	0	0	5177	5092	4134
200.14552 Da 915.00 s	15.25	199.138		C11H20O3	1321	1543	0	1373	181	0	1180	0	0	0	1664	1770	1450	1393	0	1349	1306	1327	0	0	1312	0	0	1334	1305	1439	0	0	0	0	235	1327	0	0	0	187	0	1570	1408	1276
206.13258 Da 915.33 s	15.26	205.125		C13H18O2	75881	75895	0	76638	0	0	82326	0	0	0	83268	0	78787	81778	0	81857	77650	81797	0	0	93069	0	0	94513	99377	95698	0	0	0	0	0	89815	0	0	0	0	0	108846	103662	95967
175.94531 Da 915.34 s	15.26	174.938			3242	3219	613	3143	604	699	3280	692	704	772	3319	3452	3428	3594	0	3551	3581	3557	1564	3461	0	6228	6511	6397	6129	6177	2140	0	2134	0	820	6276	701	816	6631	718	870	6580	6500	6281
122.07420 Da 915.37 s	15.26	121.067		C8H10O	0	0	12486	0	11820	11571	0	12110	12057	12192	0	0	0	0	11553	0	0	0	11774	0	0	0	0	0	0	0	13400	14564	0	0	13870	0	13341	14021	0	14695	15659	0	0	0
206.22277 Da 915.41 s	15.26	205.215			0	0	0	0	78193	80042	0	80112	81598	80173	0	0	0	0	0	0	0	0	0	0	0	0	0	0	0	0	0	0	0	0	99219	0	100543	97960	0	97950	94467	0	0	0
251.21783 Da 922.43 s	15.37	250.211		C11H29N3O3	0	0	0	0	18084	18359	0	18427	19158	18916	0	0	0	0	0	0	0	0	0	0	0	0	0	0	0	0	0	0	0	0	27105	0	28680	27104	0	28335	28289	0	0	0
444.35269 Da 943.50 s	15.73	443.345		C18H49N6O4P	0	0	0	2061	2367	2225	2199	2255	2079	2219	0	0	2571	0	0	0	0	0	0	0	0	0	0	2021	2325	1967	0	0	0	0	1808	0	1922	1667	0	1754	1896	2067	1841	0
266.22397 Da 1020.92 s	17.02	265.217		C10H30N6S	0	0	0	0	34457	36600	0	31832	36465	36741	0	0	0	0	0	0	0	0	0	0	0	0	0	0	0	0	0	0	0	0	47382	0	27767	24003	0	27735	27177	0	0	0
324.19434 Da 1021.18 s	17.02	323.187		C12H29N4O4P	354	0	0	0	2647	2684	0	2754	2566	2889	0	0	0	0	0	0	302	370	0	0	0	0	0	0	0	0	0	264	0	0	3179	0	1961	1598	0	1962	1747	0	0	0
169.97988 Da 1025.09 s	17.08	168.973		C6H3O4P	6224	6146	0	6386	0	0	6857	0	0	0	6896	7400	6894	7292	7050	7001	7717	7366	7237	7482	0	8104	8073	8290	8881	9366	0	7668	0	8166	0	8107	118	0	8469	0	0	8752	8410	5706
147.97169 Da 1064.54 s	17.74	146.964		C3H4N2OS2	1154	1220	594	1466	595	581	1495	651	631	667	1327	1369	1379	1381	1265	1363	1351	1363	1406	1326	0	1888	1790	2425	2240	2136	0	2350	0	2251	695	2346	819	866	1917	852	800	2291	2377	2047
183.97370 Da 1064.56 s	17.74	182.966		C4HN4O3P	33369	32386	0	31202	0	0	31034	0	0	0	34362	35398	34736	34461	0	34051	34465	34358	0	35229	0	31330	31192	30273	31078	29927	0	0	0	0	0	28501	0	0	27379	0	0	31769	31163	31610
213.94702 Da 1074.63 s	17.91	212.94			4828	4880	0	4937	0	0	5183	0	0	0	5761	5047	5206	5628	5594	5464	5055	5032	0	5220	0	0	0	6866	7058	6734	1043	6952	976	6915	0	6985	0	0	0	0	0	7138	7639	7179
214.04378 Da 1075.37 s	17.92	213.036		C5H6N6O4	0	0	4973	0	5431	5208	0	5249	5120	5119	0	0	0	0	0	0	0	0	0	0	0	0	0	0	0	0	0	0	0	0	7240	125	6872	6664	0	7094	7468	0	0	0
195.96586 Da 1077.76 s	17.96	194.959			7226	7257	584	7622	530	526	8017	517	490	485	7889	8223	6882	8028	0	7786	7291	7807	5817	6729	5470	5811	5415	6270	6614	7714	167	0	149	6268	1105	3970	1015	1010	0	1091	1202	5247	5667	6142
442.36119 Da 1096.55 s	18.28	441.354			0	0	0	2259	1760	2041	1962	1662	1896	2153	0	0	1804	0	0	0	0	0	0	0	0	0	0	1721	1719	2594	0	0	0	0	1729	0	1657	1586	0	1778	1868	1884	2035	0
294.26008 Da 1096.60 s	18.28	293.253		C16H38O2S	0	0	0	0	38902	35470	0	34450	36469	43077	0	0	0	0	0	0	0	0	0	0	0	0	0	0	0	0	0	0	26190	0	27850	0	27654	26538	0	30875	29443	0	0	0
189.96342 Da 1098.99 s	18.32	188.956		C4H3N2O3PS	2189	1993	0	2306	0	0	2187	0	0	0	2451	2228	3198	2100	0	2217	2072	2197	0	0	0	0	1633	1648	1622	2060	0	1723	0	1497	0	4522	0	0	468	0	0	1743	1534	1675
256.30625 Da 1099.38 s	18.32	255.299			0	0	0	0	6957	8782	0	6672	7174	8408	0	0	0	0	0	0	0	0	0	0	0	0	0	0	0	0	0	0	0	0	3140	0	3295	3655	0	3543	3261	0	0	0
135.94171 Da 1100.23 s	18.34	134.934			0	0	98827	0	100021	107056	0	101702	101704	101921	0	0	0	0	0	0	0	0	0	0	0	0	0	0	0	0	0	0	0	0	73286	0	73520	74084	0	75844	76710	0	0	0
101.92487 Da 1127.67 s	18.79	100.918			54083	54511	0	0	0	0	54973	0	0	0	57513	56786	56374	50670	0	0	58683	57785	0	0	0	64780	345	66832	64230	64322	0	0	0	0	0	65333	0	0	278	0	0	65215	66069	65280
120.99164 Da 1160.77 s	19.35	119.984			282	229	5463	191	5835	4727	259	5937	5670	5760	201	144	267	224	5819	184	241	161	5782	0	0	191	0	148	165	196	5374	5458	0	0	5785	166	5596	5496	0	5678	6175	167	174	271
63.01667 Da 1165.23 s	19.42	62.0094			0	0	0	0	6816	6868	0	7132	7150	7370	0	0	0	0	0	0	0	0	0	6939	8198	0	0	0	0	0	0	0	0	0	7971	0	9204	8558	0	8703	8620	0	0	0
132.03870 Da 1168.12 s	19.47	131.031		C4H8N2OS	537	566	9420	432	8802	9057	542	8618	9359	9532	477	488	562	469	8410	476	514	507	0	446	415	519	349	537	582	570	0	7696	596	8365	8002	586	11209	5970	291	6504	6339	639	470	487
120.03660 Da 1187.65 s	19.79	119.029		C3H8N2OS	0	246	6339	0	6387	6720	0	6678	6801	6678	186	0	0	169	6328	0	107	0	6942	0	0	0	0	0	0	141	7872	7344	0	7153	8192	0	13125	7833	0	8532	7928	0	0	0
133.91324 Da 1191.64 s	19.86	132.906			4852	1331	3298	1372	3222	3493	1518	3558	3516	3555	1465	1645	1392	1301	3442	1361	5298	5391	3361	1395	0	5717	5734	5435	4954	5873	3884	3755	0	3572	4051	5293	4782	4095	5332	4343	4230	5093	5676	4894
103.99572 Da 1197.57 s	19.96	102.988			424	432	4783	451	4674	4879	392	5100	4956	5959	459	533	435	427	1212	0	399	467	1401	4901	176	192	0	247	214	218	230	0	5252	0	7852	285	7378	8075	0	8493	7947	198	260	261
103.95074 Da 1198.09 s	19.97	102.943			4736	4669	0	4301	1194	1414	4471	1178	1289	1448	5270	5164	4873	5007	0	1290	5515	4910	0	0	7593	0	272	7027	7146	7237	1350	0	1331	0	1403	7303	1534	1527	292	1514	1392	7271	7772	7773
208.20246 Da 691.53 s	11.53	207.195			0	0	0	0	4905	5069	0	5035	5408	5362	0	0	0	0	0	0	0	0	0	0	0	0	0	0	0	0	0	0	0	0	8551	0	8963	8476	0	9395	8942	0	0	0
208.11069 Da 691.62 s	11.53	207.103		C12H16O3	4737	4950	0	4809	0	0	4896	0	0	0	5464	0	5328	5266	0	5182	5161	5265	0	0	8496	0	0	9232	9212	8302	1030	8319	1084	0	0	8396	0	0	0	0	0	8931	9102	8696
208.11026 Da 717.79 s	11.96	207.103		C12H16O3	29927	29889	0	28296	0	0	32045	0	0	0	33783	0	33781	32604	0	33832	33689	33905	0	0	48871	0	0	50133	51311	49818	1149	48804	970	48102	0	49351	0	0	0	0	0	50035	50126	50555
208.20260 Da 717.74 s	11.96	207.195		C10H28N2S	0	0	0	0	30645	30686	0	32271	31742	33642	0	0	0	0	0	0	0	0	0	0	0	0	0	0	0	0	0	0	0	0	51056	0	48714	49608	0	50144	50016	0	0	0
294.25773 Da 763.21 s	12.72	293.25		C19H34O2	0	0	0	0	98546	101762	0	100002	100824	101530	0	0	0	0	0	0	0	0	0	0	0	0	0	0	0	0	0	0	94736	0	96821	0	97470	96921	0	96871	94752	0	0	0
312.27175 Da 773.36 s	12.89	311.264		C19H36O3	0	0	0	0	5222	5431	0	0	5267	5534	0	0	0	0	0	0	0	0	0	0	0	0	0	0	0	0	0	0	0	0	4427	0	4596	4819	0	4413	4307	0	0	0

## Sheet: Figure 3
Original microscope images in KKU-100, related to figure 3A															Original microscope images in KKU-213A, related to figure 3B
		Negative control			Control		IC25		IC50		IC75						Negative control			Control		IC25		IC50		IC75
	Raw data of TMRE intensity, related to figure 3A and 3B
		KKU-100					KKU-213A
	Niclosamide (uM)	1	2	3	4	5	1	2	3	4	5
	Control	100	100	100	100	100	100	100	100	100	100
	IC25	44.9	45.01	44.89	43.06	43.41	42.51	35.92	31.63	38.67	31.26
	IC50	33.69	30.67	31.91	35.11	33.21	23.12	17.56	16.71	20.96	24.73
	IC75	25.91	24.01	24.18	22.97	26.07	16.65	15.27	11.39	14.3	9.8

## Sheet: Figure 4
Raw data of spectral intensity of metabolites, related to figure 4
	Niacinamide	Control					Niclosamide
	KKU-100	22748	24155	23452	16075	18808	37769	51470	37071	40486	49193
	KKU-213A	1139	0	0	6991	5429	15754	10289	11281	11911	11762
	N8-Acetylspermidine	Control					Niclosamide
	KKU-100	13954	8665	0	10237	13795	29194	34834	34552	33294	8125
	KKU-213A	589	947	0	720	910	11477	18228	10831	8799	9933
	Myristamide	Control					Niclosamide
	KKU-100	0	0	0	0	0	4453	3716	4013	0	3589
	KKU-213A	10287	10702	11468	13110	11588	13471	14068	12971	13575	13912

## Sheet: Figure 5
	Raw data of NAD/NADH ratio, related to figure 5A
	KKU-100	1 hr			2 hrs			3 hrs			4 hrs
		1	2	3	1	2	3	1	2	3	1	2	3
	Control	57	52.8	46.833	50.27	54.394	45.525	42.506	52.939	33.87	33.307	35.081	34.41
	0.2	34.367	28	26.268	26.8	24.609	21.238	18.802	20.736	15.4	13.434	15.843	13.902
	0.4	17.696	18.269	16.814	12.792	12.62	12.512	11.085	10.87	9.995	9.246	10.193	9.549
	0.8	13.477	13.071	12.356	9.919	10.048	9.314	8.759	7.972	6.598	6.004	6.134	6.524
	1.2	8.143	8.151	7.484	6.839	7.152	5.495	6.314	5.2	5.649	5.296	4.575	3.941
	KKU-213A	1 hr			2 hrs			3 hrs			4 hrs
		1	2	3	1	2	3	1	2	3	1	2	3
	Control	80.423	91.261	88.783	63.821	59.186	54.452	46.66	49.861	46.38	38.14	37.732	33.338
	0.2	53.132	55.324	46.419	38.148	39.458	34.511	28.658	26.03	31.912	21.173	21.709	22.895
	0.4	33.2	32.34	24.971	25.637	24.128	19.683	18.379	18.326	17.572	13.129	12.268	12.875
	0.8	20.597	19.935	16.867	14.632	13.31	13.06	11.461	11.231	10.992	9.155	9.253	8.854
	1.2	9.66	9.385	9.608	7.707	7.638	8.827	6.929	6.623	5.941	6.018	5.452	5.22
	Raw data of ATP concentration, related to figure 5B
	KKU-100	1	2	3		KKU-213A	1	2	3
	Control	0.4	0.389	0.476		Control	0.646	0.621	0.759
	IC25	0.405	0.348	0.426		IC25	0.519	0.515	0.631
	IC50	0.316	0.299	0.336		IC50	0.416	0.411	0.503
	IC75	0.29	0.268	0.279		IC75	0.359	0.319	0.39

## Sheet: Table 2
											Spectral intensity
KKU100											control					Niclosamide
	Var ID (Primary)	Var ID (RT)	Var ID (m/z)	Var ID (Name)	Var ID (Formula)	M5.VIP[1+1+0]	2.44693 * M5.VIP[1]cvSE	M5.p[1]	M5.p(corr)[1]		1	2	3	4	5	1	2	3	4	5
	122.04571 Da 80.19 s	1.34	123.053	Niacinamide	C6H6N2O	1.33348	0.503609	0.0841362	0.899466		1139	0	0	6991	5429	15754	10289	11281	11911	11762
	187.16823 Da 60.22 s	1	188.176	Acetylspermidine	C9H21N3O	1.77706	0.772704	0.109854	0.773638		13954	8665	0	10237	13795	29194	34834	34552	33294	8125
	227.22558 Da 961.06 s	16.02	228.233	Myristamide	C14H29NO	0.787125	0.243796	0.0499934	0.886166		0	0	0	0	0	4453	3716	4013	0	3589
											Spectral intensity
KKU213A											control					Niclosamide
	Var ID (Primary)	Var ID (RT)	Var ID (m/z)	Var ID (Name)	Var ID (Formula)	M5.VIP[1+1+0]	2.44693 * M5.VIP[1]cvSE	M5.p[1]	M5.p(corr)[1]		1	2	3	4	5	1	2	3	4	5
	122.04571 Da 80.19 s	1.34	123.053	Niacinamide	C6H6N2O	3.27008	2.67432	0.213791	0.842369		22748	24155	23452	16075	18808	37769	51470	37071	40486	49193
	187.16823 Da 60.22 s	1	188.176	Acetylspermidine	C9H21N3O	2.40803	1.4961	0.158226	0.877575		589	947	0	720	910	11477	18228	10831	8799	9933
	227.22558 Da 961.06 s	16.02	228.233	Myristamide	C14H29NO	1.10527	0.420157	0.0726322	0.868056		10287	10702	11468	13110	11588	13471	14068	12971	13575	13912
